# Supplementary material for: iTRAQ-based proteomics for studying the effects of dioscin against nonalcoholic fatty liver disease in rats
Source: Royal Society of Chemistry journal article supplement (doi:10.1039/c4ra03948c), 2014-07-03
Supplement: c4ra03948c1.pdf [file c4ra03948c1.pdf]

## Supporting Materials

### **iTRAQ-based proteomics for studying the effects of dioscin against nonalcoholic fatty liver disease in rats**

Lina Xu<sup>a</sup>, Yongli Wei<sup>a</sup>, Deshi Dong<sup>a,b</sup>, Lianhong Yin<sup>a</sup>, Yan Qi<sup>a</sup>, Xu Han<sup>a</sup>, Youwei Xu<sup>a</sup>, Yanyan Zhao<sup>a</sup>, Kexin Liu<sup>a</sup>, Jinyong Peng<sup>a,c,\*</sup>

**Table 1 List of the up regulated proteins in rat model of nonalcoholic fatty liver disease identified by proteomics.**

| Accession No.     | Gene symbol and name                                                                      | Accession No.     | Gene symbol and name                                            | Accession No.     | Gene symbol and name                                               |
|-------------------|-------------------------------------------------------------------------------------------|-------------------|-----------------------------------------------------------------|-------------------|--------------------------------------------------------------------|
| IPI:IPI00202580.3 | Cyp2d3 Uncharacterized protein                                                            | IPI:IPI00957910.1 | Mon2 Uncharacterized protein                                    | IPI:IPI00197703.2 | Apoa1 Apolipoprotein A-I                                           |
| IPI:IPI00551774.1 | RT1-EC2 Mature alpha chain of major histocompatibility complex class I antigen (Fragment) | IPI:IPI00213611.1 | LOC287167 Uncharacterized protein                               | IPI:IPI00198590.2 | Bud31 Protein BUD31 homolog                                        |
| IPI:IPI00207146.1 | Hbb-b1 Zero beta-1 globin                                                                 | IPI:IPI00464503.1 | MGC94335 Uncharacterized protein C2orf47 homolog, mitochondrial | IPI:IPI00231209.5 | Arhgef7 Uncharacterized protein                                    |
| IPI:IPI00367281.2 | Acnat2 Acyl-coenzyme A amino acid N-acyltransferase 2                                     | IPI:IPI00778443.1 | Cyp2c22 Cytochrome P450 2C70                                    | IPI:IPI00286154.3 | Cyb5a Isoform Long of Cytochrome b5                                |
| IPI:IPI00326972.6 | Ces1d Carboxylesterase 3                                                                  | IPI:IPI00851130.1 | Gda Uncharacterized protein                                     | IPI:IPI00359323.1 | Thrap3 Thyroid hormone receptor-associated protein 3               |
| IPI:IPI00231818.7 | Sult2a11 Alcohol sulfotransferase A                                                       | IPI:IPI00200651.5 | Nans N-acetylneuraminic acid synthase                           | IPI:IPI00209570.2 | Me2 NAD-dependent malic enzyme, mitochondrial                      |
| IPI:IPI00911371.2 | Acad10 RGD1310159 protein                                                                 | IPI:IPI00327626.1 | Ugt2b5 UDP-glucuronosyltransferase 2B17                         | IPI:IPI00958362.1 | LOC100365679 DENN/MADD domain containing 5B-like                   |
| IPI:IPI00858393.1 | Plcd1 Phospholipase C delta 1 long form                                                   | IPI:IPI00206743.3 | Tmem111 Transmembrane protein 111                               | IPI:IPI00359780.3 | Nol9 nucleolar protein 9                                           |
| IPI:IPI00911209.1 | RT1-EC2 Mature alpha chain of major histocompatibility complex class I antigen (Fragment) | IPI:IPI00373467.4 | Man1b1 mannosidase, alpha, class 1B, member 1                   | IPI:IPI00196440.1 | Wasl; Iqub Neural Wiskott-Aldrich syndrome protein                 |
| IPI:IPI00199636.1 | Canx Calnexin                                                                             | IPI:IPI00382181.4 | Uncharacterized protein                                         | IPI:IPI00362610.1 | Uncharacterized protein                                            |
| IPI:IPI00557598.3 | LOC100363606 Uncharacterized protein (Fragment)                                           | IPI:IPI00779525.2 | Pus1 Pseudouridine synthase (Fragm -ent)                        | IPI:IPI00362395.5 | Esd S-formylglutathione hydrolase                                  |
| IPI:IPI00332042.9 | Aldh1a1 Retinal dehydrogenase 1                                                           | IPI:IPI00188671.1 | Galk1 Uncharacterized protein                                   | IPI:IPI00955619.1 | Sh3bgr1 SH3 domain binding glutamic acid-rich protein like         |
| IPI:IPI00370486.4 | LOC682411 Ig lambda-2 chain C region                                                      | IPI:IPI00470317.5 | Eef1g Elongation factor 1-gamma                                 | IPI:IPI00464486.1 | Pon2 Serum paraoxonase/arylesterase 2                              |
| IPI:IPI00366523.3 | Wdr61 WD repeat-containing protein 61                                                     | IPI:IPI00360056.1 | Galm Aldose 1-epimerase                                         | IPI:IPI00778978.2 | Slc4a1 Uncharacterized protein                                     |
| IPI:IPI00371143.1 | Clptm11 Uncharacterized protein                                                           | IPI:IPI00205297.1 | Ppm1f Protein phosphatase 1F                                    | IPI:IPI00372559.3 | Hsd17b8 Estradiol 17-beta-dehydrogen -ase 8                        |
| IPI:IPI00326225.3 | Dao D-amino-acid oxidase                                                                  | IPI:IPI00949120.1 | Rgp1 Uncharacterized protein                                    | IPI:IPI00454446.1 | Putative uncharacterized protein (Fragment)                        |
| IPI:IPI00371043.2 | Manf Mesencephalic astrocyte- derived neurotrophic factor                                 | IPI:IPI00361346.2 | IgG-2a LOC367586 protein                                        | IPI:IPI00367702.4 | Nhlrc3 rCG49974-like                                               |
| IPI:IPI00364738.4 | Hm13 Uncharacterized protein                                                              | IPI:IPI00325618.1 | Tap1 Antigen peptide transporter 1                              | IPI:IPI00197992.2 | MGC125086 Probable gluconokinase                                   |
| IPI:IPI00361512.4 | Abca8a ATP-binding cassette, sub- family A (ABC1), member 8a                              | IPI:IPI00363960.1 | Dnajc17 Uncharacterized protein                                 | IPI:IPI00210368.1 | Homer3 Homer protein homolog 3                                     |
| IPI:IPI00214482.1 | Cyp51 Lanosterol 14-alpha demethyl -ase                                                   | IPI:IPI00231499.3 | Abcc3 canalicular multispecific organic anion transporter 2     | IPI:IPI00400681.1 | Ppp1r12a Isoform 2 of Protein phosphatase 1 regulatory subunit 12A |
| IPI:IPI00958096.1 | LOC100360950 GF20391-like isoform 1                                                       | IPI:IPI00195878.5 | Ccdc44 Translational activator of cytochrome c oxidase 1        | IPI:IPI00764567.1 | Adssl1 adenylosuccinate synthase like 1-like isoform 2             |
| IPI:IPI00214437.4 | Ugt1a1 Uncharacterized protein                                                            | IPI:IPI00777194.1 | Gne 83 kDa protein                                              | IPI:IPI00205417.5 | Slc27a2 Very long-chain acyl-CoA synthetase                        |
| IPI:IPI00201300.2 | Ptrf Polymerase I and transcript release factor                                           | IPI:IPI00202971.1 | Dhrs1 Uncharacterized protein                                   | IPI:IPI00554206.3 | Ugt2b UDP glycosyltransferase 2 family, polypeptide B              |
| IPI:IPI00231663.7 | Lgals5 Galectin-5                                                                         | IPI:IPI00876581.1 | Rbp4 Retinol-binding protein 4                                  | IPI:IPI00214394.1 | Csad Cysteine sulfinic acid decarbox -ylase                        |

|                    |                                                                |                   |                                                                                                |                   |                                                                    |
|--------------------|----------------------------------------------------------------|-------------------|------------------------------------------------------------------------------------------------|-------------------|--------------------------------------------------------------------|
| IPI:IPI00210823.1  | Akr1d1 3-oxo-5-beta-steroid 4-dehy -<br>drogenase              | IPI:IPI00949873.1 | Sult1c2 Uncharacterized protein                                                                | IPI:IPI00557984.3 | Hsd12 Uncharacterized protein (Fragm -ent)                         |
| IPI:IPI00207010.2  | Baat Bile acid-CoA: amino acid N-<br>acyltransferase           | IPI:IPI00361243.2 | Cpsf7 Uncharacterized protein                                                                  | IPI:IPI00870110.1 | Fycy1 Uncharacterized protein                                      |
| IPI:IPI00213045.4  | Cyp2j4 Uncharacterized protein                                 | IPI:IPI00766105.2 | Mtx1 Mtx1 protein (Fragment)                                                                   | IPI:IPI00363818.1 | Kdsr Uncharacterized protein                                       |
| IPI:IPI00188158.1  | Hmgcs1 Hydroxymethylglutaryl-CoA<br>synthase, cytoplasmic      | IPI:IPI00949293.1 | Uncharacterized protein (Fragment)                                                             | IPI:IPI00207663.2 | Ctsz Cathepsin Z                                                   |
| IPI:IPI00654464.2  | Mettl7a Methyltransferase like 7A, isoform<br>CRA_b            | IPI:IPI00911258.1 | RGD1309350 Uncharacterized protein                                                             | IPI:IPI00191737.6 | Alb Serum albumin                                                  |
| IPI:IPI00553946.1  | Cyp2c13 Cytochrome P450 2c13                                   | IPI:IPI00213659.3 | Decr1 2,4-dienoyl-CoA reductase,<br>mitochondrial                                              | IPI:IPI00480679.4 | Krt18 Keratin, type I cytoskeletal 18                              |
| IPI:IPI00361813.3  | Usp46 ubiquitin carboxyl-terminal<br>hydrolase 46              | IPI:IPI00190402.1 | Ugt2b1 UDP-glucuronosyltransferase 2B1                                                         | IPI:IPI00326561.3 | Ech1 Delta(3,5)-Delta(2,4)-dienoyl-CoA<br>isomerase, mitochondrial |
| IPI:IPI00325189.4  | Nme2 Nucleoside diphosphate kinase B                           | IPI:IPI00331983.5 | Adh1 Alcohol dehydrogenase 1                                                                   | IPI:IPI00195803.1 | Ugdh UDP-glucose 6-dehydrogenase                                   |
| IPI:IPI00371079.3  | Ccdc51 Coiled-coil domain-containing<br>protein 51             | IPI:IPI00831745.1 | Anxa6 annexin A6                                                                               | IPI:IPI00202513.1 | Ces2a Uncharacterized protein                                      |
| IPI:IPI00780578.2  | Myo18a Uncharacterized protein                                 | IPI:IPI00190530.3 | Mapk14 Isoform 1 of Mitogen-activated<br>protein kinase 14                                     | IPI:IPI00557327.1 | Ndufa8 Uncharacterized protein                                     |
| IPI:IPI00421490.1  | Naprt1 Nicotinate phosphoribosyltr-<br>ansferase               | IPI:IPI00957953.1 | Map4 Microtubule-associated protein                                                            | IPI:IPI00421610.3 | Iah1 Isoamyl acetate-hydrolyzing esterase 1<br>homolog             |
| IPI:IPI00396902.1  | Soat2 Sterol O-acyltransferase 2                               | IPI:IPI00213847.3 | Grn granulins isoform a                                                                        | IPI:IPI00191895.4 | Nhp21i;LOC100359574;LOC100365340<br>NHP2-like protein 1            |
| IPI:IPI00362931.1  | Ogn Uncharacterized protein                                    | IPI:IPI00870163.1 | Agl Uncharacterized protein                                                                    | IPI:IPI00366110.3 | Nap114 Uncharacterized protein                                     |
| IPI:IPI00470302.1  | Mpi Mannose-6-phosphate isomerase                              | IPI:IPI00949858.1 | Ctsc Uncharacterized protein                                                                   | IPI:IPI00464670.1 | Capg Macrophage-capping protein                                    |
| IPI:IPI00231858.5  | Gstt2 Glutathione S-transferase theta -2                       | IPI:IPI00209690.1 | Ephx1 Epoxide hydrolase 1                                                                      | IPI:IPI00188804.1 | Rplp2 60S acidic ribosomal protein P2                              |
| IPI:IPI00870888.2  | Uncharacterized protein (Fragment)                             | IPI:IPI00564133.1 | Kat3 Kynurenine-oxoglutarate transam-<br>inase 3                                               | IPI:IPI01016513.1 | At13 Uncharacterized protein                                       |
| IPI:IPI00200041.4  | Pbld Phenazine biosynthesis-like domain-<br>containing protein | IPI:IPI00359491.4 | Ctnnd1 Uncharacterized protein                                                                 | IPI:IPI00195615.5 | Abcb11 Bile salt export pump                                       |
| IPI:IPI00198519.1  | Abcb4 Multidrug resistance protein 2                           | IPI:IPI00949360.1 | Pcd11 Uncharacterized protein                                                                  | IPI:IPI00475707.2 | Ugt1a6; Ugt1a1 UDP-glucuronosyltr-<br>ansferase 1-6                |
| IPI:IPI00364002.2  | Ugt2a3 Uncharacterized protein                                 | IPI:IPI00959692.1 | Ddx54 ATP-dependent RNA helicase<br>DDX54                                                      | IPI:IPI00326948.2 | Hsd17b4 Uncharacterized protein                                    |
| IPI:IPI00193212.1  | Clec4f C-type lectin domain family 4<br>member F               | IPI:IPI00368321.3 | Tmem56 Uncharacterized protein                                                                 | IPI:IPI00231194.5 | Ddah1 N(G), N (G)-dimethylarginine<br>dimethylaminohydrolase 1     |
| IPI:IPI00204640.1  | Uncharacterized protein                                        | IPI:IPI00938552.1 | Mocs2 molybdopterin synthase catalytic<br>subunit isoform Mocs2A                               | IPI:IPI00231365.5 | Uox Uricase                                                        |
| IPI:IPI00952435.1  | Uncharacterized protein (Fragment)                             | IPI:IPI00563873.3 | Arpc5l;Arpc5l-ps1 Isoform 1 of Actin-<br>related protein 2/3 complex subunit 5-like<br>protein | IPI:IPI00949482.1 | Fam21c Uncharacterized protein                                     |
| IPI:IPI00991212.1  | Ero1lb endoplasmic oxidoreductase 1 beta-<br>like              | IPI:IPI00363471.1 | Snrpd1 Uncharacterized protein                                                                 | IPI:IPI00765956.1 | LOC684755 zinc finger like protein 1-like<br>isoform 3             |
| IPI:IPI00200344.1  | Scpep1 Retinoid-inducible serine<br>carboxypeptidase           | IPI:IPI00949029.1 | Kif13b Uncharacterized protein                                                                 | IPI:IPI00201561.3 | Prdx2 Peroxiredoxin-2                                              |
| RRRRRIPI:IPI003942 | Kcnd2 Potassium voltage-gated channel                          | IPI:IPI00561622.1 | Sult1c2a Sulfotransferase family, cytosolic,                                                   | IPI:IPI00371621.1 | Mcee Uncharacterized protein                                       |

|                   |                                                                           |                   |                                                                  |                   |                                                                           |
|-------------------|---------------------------------------------------------------------------|-------------------|------------------------------------------------------------------|-------------------|---------------------------------------------------------------------------|
| 18.1              | subfamily D member 2                                                      |                   | 1C, member 2a                                                    |                   |                                                                           |
| IPI:IPI00198324.1 | Cyp2b3 Cytochrome P450 2B3                                                | IPI:IPI00365209.4 | RGD1561672 echinoderm microtubule associated protein like 6-like | IPI:IPI00568450.3 | Clybl Isoform 1 of Citrate lyase subunit beta-like protein, mitochondrial |
| IPI:IPI00212658.4 | Gnb2 Guanine nucleotide-binding protein G(I)/G(S)/G(T) subunit beta-2     | IPI:IPI00231639.7 | Gstm1 Glutathione S-transferase Mu 1                             | IPI:IPI00190790.1 | Fabp1 Fatty acid-binding protein, liver                                   |
| IPI:IPI00211392.1 | Ftcd Formimidoyl transferase-cyclodeaminase                               | IPI:IPI00393333.3 | Atic Bifunctional purine biosynthesis protein PURH               | IPI:IPI00464668.1 | Irgm Immunity-related GTPase family M protein                             |
| IPI:IPI00948363.1 | Psmel Uncharacterized protein                                             | IPI:IPI00209916.1 | LOC362855 tRNA-splicing ligase RtcB homolog                      | IPI:IPI00231275.7 | Lgals1 Galectin-1                                                         |
| IPI:IPI00471545.5 | Keg1 Glycine N-acyltransferase-like protein Keg1                          | IPI:IPI00958570.1 | Fth1 Ferritin (Fragment)                                         | IPI:IPI00777957.2 | Acp2 Uncharacterized protein                                              |
| IPI:IPI00203152.1 | Ctbs Di-N-acetylchitobiase                                                | IPI:IPI00369534.1 | Alkbh5 Uncharacterized protein                                   | IPI:IPI00213569.1 | Ugt1a1 UDP-glucuronosyltransferase 1-1                                    |
| IPI:IPI00193277.1 | Hsd17b11 Estradiol 17-beta-dehydrogenase 11                               | IPI:IPI00781733.2 | LOC683399 Putative uncharacterized protein                       | IPI:IPI00327662.3 | Sptbn2 Spectrin beta chain, brain 2                                       |
| IPI:IPI00199733.6 | Naa35 N-alpha-acetyltransferase 35, NatC auxiliary subunit                | IPI:IPI00198717.8 | Mdh1 Malate dehydrogenase, cytoplasmic                           | IPI:IPI00208203.2 | Eci2 Enoyl-CoA delta isomerase 2, mitochondrial                           |
| IPI:IPI00368397.2 | LOC366772 BWK3                                                            | IPI:IPI00948721.1 | Acaa2 Uncharacterized protein (Fragment)                         | IPI:IPI00553899.1 | Glrx3 Isoform 1 of Glutaredoxin-3                                         |
| IPI:IPI00207390.9 | Anxa3 Annexin A3                                                          | IPI:IPI01016469.1 | Ugt2b37 UDP-glucuronosyltransferase 2B37 precursor               | IPI:IPI00394353.1 | Hexa Beta-hexosaminidase subunit alpha                                    |
| IPI:IPI00326436.3 | Oplah 5-oxoprolinase                                                      | IPI:IPI00213688.1 | Set Isoform 1 of Protein SET                                     | IPI:IPI00561065.2 | Crmp1 Uncharacterized protein                                             |
| IPI:IPI00358343.5 | LOC362382 rCG47027-like                                                   | IPI:IPI00951385.1 | Paics Uncharacterized protein                                    | IPI:IPI00869998.3 | Psmb5 Proteasome subunit beta type-5                                      |
| IPI:IPI00553964.2 | Rfk;RGD1563242 Uncharacterized protein                                    | IPI:IPI00193584.7 | Rnpep Aminopeptidase B                                           | IPI:IPI00209795.1 | Ggcx Vitamin K-dependent gamma-carboxylase                                |
| IPI:IPI00324986.1 | Gdi1 Rab GDP dissociation inhibitor alpha                                 | IPI:IPI00373505.2 | Tmod3 Uncharacterized protein                                    | IPI:IPI00231139.6 | Tkt transketolase                                                         |
| IPI:IPI00368888.2 | Igh-6 Igh-6 protein                                                       | IPI:IPI00763653.2 | LOC689443 Uncharacterized protein                                | IPI:IPI00365985.5 | Hsp90b1 Isoform 1 of Endoplasmic                                          |
| IPI:IPI00231292.7 | Hrsp12 Ribonuclease UK114                                                 | IPI:IPI00208106.1 | Fads2 Fatty acid desaturase 2                                    | IPI:IPI00205566.1 | Cnn3 Calponin-3                                                           |
| IPI:IPI00764977.2 | Rspry1 Ring finger and SPRY domain containing 1                           | IPI:IPI00366977.4 | Cpne3 Uncharacterized protein                                    | IPI:IPI00214536.1 | Nop58 Nucleolar protein 58                                                |
| IPI:IPI00325912.1 | Ctnnb1 Catenin beta-1                                                     | IPI:IPI00202520.1 | Creld1 Cysteine-rich with EGF-like domain protein 1              | IPI:IPI00369462.2 | Dohh Deoxyhypusine hydroxylase                                            |
| IPI:IPI00231825.5 | Rbp1 Retinol-binding protein 1                                            | IPI:IPI00358618.3 | Hira protein HIRA                                                | IPI:IPI00362626.1 | Lsm4 Uncharacterized protein                                              |
| IPI:IPI00948763.1 | Slco2a1 Uncharacterized protein (Fragment)                                | IPI:IPI00781488.2 | Pde4dip Uncharacterized protein                                  | IPI:IPI00206816.1 | Ifitm2 Uncharacterized protein                                            |
| IPI:IPI00369048.2 | Gng10 guanine nucleotide-binding protein G(I)/G(S)/G(O) subunit gamma -10 | IPI:IPI00201444.1 | Dynll1 Dynein light chain 1, cytoplasmic                         | IPI:IPI00919311.1 | Perld1 RCG33619, isoform CRA_a                                            |
| IPI:IPI00358845.4 | Prosc Uncharacterized protein                                             | IPI:IPI00362469.2 | Pgls 6-phosphogluconolactonase                                   | IPI:IPI00760130.2 | Strn3 Isoform 1 of Striatin-3                                             |
| IPI:IPI00190125.1 | Tm4sf4 Transmembrane 4 L6 family member 4                                 | IPI:IPI00471889.7 | Anxa5 Annexin A5                                                 | IPI:IPI00390133.1 | Apo19a Uncharacterized protein                                            |
| IPI:IPI00204774.1 | Ces1l Liver carboxylesterase B-1                                          | IPI:IPI00765231.1 | Pm20d1 probable carboxypeptidase PM20D1                          | IPI:IPI00213057.3 | Acadv1 Very long-chain specific acyl-CoA dehydrogenase, mitochondrial     |
| IPI:IPI00230979.1 | Nampt Nicotinamide phosphoribosyl transferase                             | IPI:IPI00392676.4 | Blvrb Uncharacterized protein                                    | IPI:IPI00951116.1 | Hbb 16 kDa protein                                                        |
| IPI:IPI00368090.4 | Uncharacterized protein (Fragment)                                        | IPI:IPI00212796.3 | Ran GTP-binding nuclear protein Ran                              | IPI:IPI00370658.1 | Pnn Uncharacterized protein                                               |
| IPI:IPI00359690.3 | Prmt5 protein arginine N-methyltransferase 5                              | IPI:IPI00205264.1 | Ttc36 Tetratricopeptide repeat protein 36                        | IPI:IPI00366942.3 | Rnf149 Uncharacterized protein                                            |

| Accession No.                                                                                                                           | Gene symbol and name                                                                             | Accession No.     | Gene symbol and name                                              | Accession No.     | Gene symbol and name                                                                         |
|-----------------------------------------------------------------------------------------------------------------------------------------|--------------------------------------------------------------------------------------------------|-------------------|-------------------------------------------------------------------|-------------------|----------------------------------------------------------------------------------------------|
| IPI:IPI00190974.1                                                                                                                       | Sfxn5 Sideroflexin-5                                                                             | IPI:IPI00208026.1 | Selenbp1 Selenium-binding protein 1                               | IPI:IPI00210542.1 | Gsta4 Glutathione S-transferase alpha-4                                                      |
| <b>Table 1-continued List of the down regulated proteins in rat model of nonalcoholic fatty liver disease identified by proteomics.</b> |                                                                                                  |                   |                                                                   |                   |                                                                                              |
| IPI:IPI00332027.7                                                                                                                       | Bhmt Betaine-homocysteine S-meth -<br>yltransferase 1                                            | IPI:IPI00201325.1 | Txndc17 Uncharacterized protein                                   | IPI:IPI00765236.2 | LOC684274 LOC684274 protein                                                                  |
| IPI:IPI00215358.1                                                                                                                       | Cdh17 Cadherin-17                                                                                | IPI:IPI00480789.1 | LOC100363469 40S ribosomal protein<br>S24                         | IPI:IPI00911188.2 | RGD1565192 hypothetical protein<br>LOC501923                                                 |
| IPI:IPI00193769.3                                                                                                                       | Sds Isoform 2 of L-serine dehydratase/L-<br>threonine deaminase                                  | IPI:IPI00212694.1 | Egfr Epidermal growth factor receptor                             | IPI:IPI00364813.1 | Hdac11;Hdac1 Histone deacetylase 1                                                           |
| IPI:IPI00231102.10                                                                                                                      | Plp1 Myelin proteolipid protein                                                                  | IPI:IPI00359917.1 | Thumpd1 Uncharacterized protein                                   | IPI:IPI00371251.4 | Cd2bp2 Uncharacterized protein                                                               |
| IPI:IPI00193279.1                                                                                                                       | Oat Ornithine aminotransferase,<br>mitochondrial                                                 | IPI:IPI00949840.1 | Cth Uncharacterized protein                                       | IPI:IPI00193369.1 | Slc9a1 Sodium/hydrogen exchanger 1                                                           |
| IPI:IPI01016596.1                                                                                                                       | Uncharacterized protein (Fragment)                                                               | IPI:IPI00951025.1 | Slc2a5 Uncharacterized protein                                    | IPI:IPI00958919.1 | LOC100365121;Mut;LOC100361295<br>Uncharacterized protein                                     |
| IPI:IPI00213663.1                                                                                                                       | Slc1a2 Isoform Glt1 of Excitatory amino<br>acid transporter 2                                    | IPI:IPI00372659.3 | Dhrs11 Putative uncharacterized protein<br>RGD1307935             | IPI:IPI00858395.1 | Aass Alpha-aminoadipic semialdehy- de<br>synthase, mitochondrial                             |
| IPI:IPI00203165.2                                                                                                                       | Vps28 Vacuolar protein sorting-<br>associated protein 28 homolog                                 | IPI:IPI00212014.3 | Vcp Transitional endoplasmic reticulum<br>ATPase                  | IPI:IPI00360346.3 | Cdc42bp3 Uncharacterized protein                                                             |
| IPI:IPI00208917.4                                                                                                                       | Aldh7a1 Alpha-aminoadipic semial -<br>dehyde dehydrogenase                                       | IPI:IPI00231683.1 | Pklr Isoform L-type of Pyruvate kinase<br>isozymes R/L            | IPI:IPI00211405.4 | Chpt1 Uncharacterized protein                                                                |
| IPI:IPI00231451.4                                                                                                                       | Atp1a3Sodium/potassium-transporting<br>ATPase subunit alpha-3                                    | IPI:IPI00896149.1 | Lrch4 Lrch4 protein                                               | IPI:IPI00568124.2 | Tmlhe Isoform 1 of Trimethyllysine<br>dioxygenase, mitochondrial                             |
| IPI:IPI00951134.2                                                                                                                       | Acly Uncharacterized protein                                                                     | IPI:IPI00958162.1 | LOC100363143 betaine—homocy- steine<br>S-methyltransferase 1-like | IPI:IPI00781839.2 | Hnrnpc Uncharacterized protein                                                               |
| IPI:IPI00206170.6                                                                                                                       | Syt1 Synaptotagmin-1                                                                             | IPI:IPI00208236.1 | MGC94207 UPF0598 protein C8orf82<br>homolog                       | IPI:IPI00829437.1 | Uncharacterized protein (Fragment)                                                           |
| IPI:IPI00230788.6                                                                                                                       | Car3 Carbonic anhydrase 3                                                                        | IPI:IPI00203317.1 | Cyp4a2 Cytochrome P450 4A2                                        | IPI:IPI00231574.1 | Grb2 Isoform 2 of Growth factor<br>receptor-bound protein 2                                  |
| IPI:IPI00197986.2                                                                                                                       | Ndufv3; Ndufv3-ps1 NADH<br>dehydrogenase [ubiquinone] flavoprotein<br>3, mitochondrial isoform 1 | IPI:IPI00781430.2 | Sbf1 Uncharacterized protein                                      | IPI:IPI00211864.1 | Sncb Beta-synuclein                                                                          |
| IPI:IPI00480855.2                                                                                                                       | RT1-EC2 MHC class I antigen                                                                      | IPI:IPI00204133.1 | Top1 DNA topoisomerase 1                                          | IPI:IPI00365406.3 | Mtrf11 Peptide chain release factor 1-like,<br>mitochondrial                                 |
| IPI:IPI00362160.1                                                                                                                       | Tubb3 Tubulin beta-3 chain                                                                       | IPI:IPI00193374.1 | Slc10a1 Sodium/bile acid cotransporter                            | IPI:IPI00231949.5 | Cd14 Monocyte differentiation antigen<br>CD14                                                |
| IPI:IPI00231505.5                                                                                                                       | Gnao1 Isoform Alpha-1 of Guanine<br>nucleotide-binding protein G(o) subunit<br>alpha             | IPI:IPI00370450.3 | Plxnb2 Uncharacterized protein                                    | IPI:IPI00192696.1 | Mad111 Uncharacterized protein                                                               |
| IPI:IPI00211127.1                                                                                                                       | Ass1 Argininosuccinate synthase                                                                  | IPI:IPI00204737.2 | Rab43 Ras-related protein Rab-43                                  | IPI:IPI00364708.2 | Rab24 RAB24, member RAS oncogene<br>family                                                   |
| IPI:IPI00208111.5                                                                                                                       | Hsd17b2 Estradiol 17-beta-dehydro-<br>genase 2                                                   | IPI:IPI00679256.2 | Ces1f Liver carboxylesterase 4                                    | IPI:IPI00390086.4 | Atp5j2 ATP synthase, H+ transpor -ting,<br>mitochondrial F0 complex, subunit f,<br>isoform 2 |
| IPI:IPI00231359.3                                                                                                                       | Acads Uncharacterized protein                                                                    | IPI:IPI00193522.3 | Sec22b Vesicle-trafficking protein                                | IPI:IPI00393599.3 | Mosc1 MOCO sulphurase C-terminal                                                             |

|                                        |                                                                                                                   |                                        |                                                                                                                               |                                        |                                                                                                                                                                          |
|----------------------------------------|-------------------------------------------------------------------------------------------------------------------|----------------------------------------|-------------------------------------------------------------------------------------------------------------------------------|----------------------------------------|--------------------------------------------------------------------------------------------------------------------------------------------------------------------------|
| IPI:IPI00831724.1<br>IPI:IPI00393189.2 | Cyp4v3 Cytochrome P450 4V2<br>Cyp8b1 Sterol 12-alpha hydroxylase                                                  | IPI:IPI00365636.3<br>IPI:IPI00199035.1 | SEC22b<br>Exd2 Uncharacterized protein<br>Pten Uncharacterized protein                                                        | IPI:IPI00952462.1<br>IPI:IPI00204392.1 | domain containing-like<br>Rpl14 60S ribosomal protein L14<br>St6gal1 Isoform RLA of Beta-galactoside alpha-2,6-sialyltransferase 1<br>St3gal1 Sialyltransferase ST3Gal-I |
| IPI:IPI00197770.1<br>IPI:IPI00327781.1 | Aldh2 Aldehyde dehydrogenase, mitochondrial<br>Cyp2c11 Cytochrome P450 2C11                                       | IPI:IPI00559327.1<br>IPI:IPI00360386.4 | Ldhd Uncharacterized protein (Fragment)<br>Hnrnpul2 Uncharacterized protein                                                   | IPI:IPI00454535.1<br>IPI:IPI00766920.3 | Wwox WW domain-containing oxidoreductase<br>Larp1 La ribonucleoprotein domain family, member 1, partial<br>Fabp7 Fatty acid-binding protein, brain                       |
| IPI:IPI00231245.5<br>IPI:IPI00231638.6 | Hao2 Hydroxyacid oxidase 2<br>Gsta1;Gsta3;Gsta2 Glutathione S-transferase alpha-1                                 | IPI:IPI00781382.3<br>IPI:IPI00480620.1 | Papss2 Uncharacterized protein<br>Bdh1 D-beta-hydroxybutyrate dehydrogenase, mitochondrial                                    | IPI:IPI00765325.2<br>IPI:IPI00231900.5 | Larp1 La ribonucleoprotein domain family, member 1, partial<br>Fabp7 Fatty acid-binding protein, brain                                                                   |
| IPI:IPI00914173.1<br>IPI:IPI00650089.1 | RT1-A Rt1.aa protein<br>Gls2 Isoform 1 of Glutaminase liver isoform, mitochondrial                                | IPI:IPI00199693.3<br>IPI:IPI00388882.3 | Map1a Microtubule-associated protein 1A<br>Skiv2l2 Uncharacterized protein                                                    | IPI:IPI00366780.1<br>IPI:IPI00382202.2 | Akr1c1 Uncharacterized protein<br>Hp Isoform 2 of Haptoglobin                                                                                                            |
| IPI:IPI00203054.2<br>IPI:IPI00464802.1 | Acsf2 Acyl-CoA synthetase family member 2, mitochondrial<br>Acsm5 Acyl-coenzyme A synthetase ACSM5, mitochondrial | IPI:IPI00198720.1<br>IPI:IPI00208224.3 | Idh3a Isocitrate dehydrogenase [NAD] subunit alpha, mitochondrial<br>Stat3 Signal transducer and activator of transcription 3 | IPI:IPI00209421.1<br>IPI:IPI00360317.1 | Endog Uncharacterized protein<br>Cd180 Uncharacterized protein                                                                                                           |
| IPI:IPI00231637.5<br>IPI:IPI00202358.2 | G6pd Glucose-6-phosphate 1-dehydrogenase<br>Gck Isoform 2 of Glucokinase                                          | IPI:IPI00231662.6<br>IPI:IPI00214373.1 | Cyb5r3 Isoform 1 of NADH-cytochrome b5 reductase 3<br>Aadat Kynurenine/alpha-aminoadipate aminotransferase, mitochondrial     | IPI:IPI00188858.4<br>IPI:IPI00471540.1 | Amacr Alpha-methylacyl-CoA racemase<br>Bhmt2 Betaine--homocysteine S-methyltransferase 2                                                                                 |
| IPI:IPI00214299.6<br>IPI:IPI00205372.3 | Cbs Isoform I of Cystathionine beta-synthase<br>Stxbp1 Isoform 1 of Syntaxin-binding protein 1                    | IPI:IPI00210389.1<br>IPI:IPI00193000.1 | Scf1 Sec1 family domain-containing protein 1<br>Rap2b Ras-related protein Rap-2b                                              | IPI:IPI00471759.1<br>IPI:IPI00211602.3 | Fam82a2 Regulator of microtubule dynamics protein 3<br>LOC100366273 rCG30986-like isoform 2                                                                              |
| IPI:IPI00870112.1<br>IPI:IPI00949736.1 | Dpysl2 Dihydropyrimidinase-related protein 2<br>Mbp Uncharacterized protein                                       | IPI:IPI01016475.1<br>IPI:IPI00358005.1 | Sel1l Uncharacterized protein<br>Chdh Uncharacterized protein                                                                 | IPI:IPI00211698.1<br>IPI:IPI00471530.2 | Flii Uncharacterized protein<br>Lap3 Isoform 1 of Cytosol aminopeptidase                                                                                                 |
| IPI:IPI00470288.4<br>IPI:IPI00208280.3 | Ckb Creatine kinase B-type<br>Ptgfn Prostaglandin F2 receptor negative regulator                                  | IPI:IPI00231200.5<br>IPI:IPI00192445.3 | Por NADPH--cytochrome P450 reductase<br>Vps24 Charged multivesicular body protein 3                                           | IPI:IPI00764232.2<br>IPI:IPI00196353.1 | LOC687295 Uncharacterized protein<br>Ccdc124 Uncharacterized protein                                                                                                     |
| IPI:IPI00194222.1<br>IPI:IPI00566093.4 | Cox4i1 Cytochrome c oxidase subunit 4 isoform 1, mitochondrial<br>Lss Lanosterol synthase                         | IPI:IPI00957827.1<br>IPI:IPI00870055.2 | Usp24 ubiquitin specific protease 24<br>Me3 NADP-dependent malic enzyme, mitochondrial                                        | IPI:IPI00400734.1<br>IPI:IPI00373076.1 | Dpagt1 Uncharacterized protein<br>Atp6v1a V-type proton ATPase catalytic subunit A                                                                                       |
| IPI:IPI00231648.5<br>IPI:IPI00200661.1 | Gnmt Glycine N-methyltransferase<br>Fasn Fatty acid synthase                                                      | IPI:IPI00373115.2<br>IPI:IPI00957949.1 | Galk2 N-acetylgalactosamine kinase<br>LOC100362324 DEAH (Asp-Glu-Ala-His) box polypeptide 29                                  | IPI:IPI00211756.1<br>IPI:IPI00882405.1 | Phb Prohibitin<br>Eci1 Uncharacterized protein                                                                                                                           |
| IPI:IPI00882453.1<br>IPI:IPI00193425.1 | Slc2a2 Solute carrier family 2, facilitated glucose transporter member 2<br>Bsg Isoform 2 of Basigin              | IPI:IPI00211936.2<br>IPI:IPI00365582.3 | Ina Alpha-internexin<br>Cad Uncharacterized protein                                                                           | IPI:IPI00210090.3<br>IPI:IPI00562653.2 | Hnrnpu SP120<br>Ctsb cathepsin B preproprotein                                                                                                                           |

|                   |                                                                          |                        |                                                                                   |                   |                                                               |
|-------------------|--------------------------------------------------------------------------|------------------------|-----------------------------------------------------------------------------------|-------------------|---------------------------------------------------------------|
| IPI:IPI00231651.6 | Basp1 Uncharacterized protein                                            | IPI:IPI00366218.3      | Cct2 T-complex protein 1 subunit beta                                             | IPI:IPI00364061.5 | Hnrnpl heterogeneous nuclear ribonucleoprotein L isoform b    |
| IPI:IPI00400736.1 | C2cd2 Uncharacterized protein                                            | IPI:IPI00324020.6      | Glul Glutamine synthetase                                                         | IPI:IPI00231081.3 | Mapk3 Isoform 2 of Mitogen-activated protein kinase 3         |
| IPI:IPI00230832.7 | Cox6c Cytochrome c oxidase subunit 6C-2                                  | IPI:IPI00382192.1      | Gpt2 Cc-5                                                                         | IPI:IPI00213058.1 | RGD620382 Deoxyribonucleoside 5'-monophosphate N-glycosidase  |
| IPI:IPI00390958.3 | Cyp2c6 Cytochrome P450 2C6                                               | IPI:IPI00565398.1      | LOC100363732;Rpl21;LOC100361811;LOC100365974;LOC100362550 Uncharacterized protein | IPI:IPI00325260.5 | Sgta Uncharacterized protein                                  |
| IPI:IPI00373108.2 | Ndufaf1 complex I intermediate-associated protein 30, mitochondrial      | IPI:IPI00231403.4      | Slc31a1 High affinity copper uptake protein 1                                     | IPI:IPI00900492.1 | Rfc1 VIP-receptor-gene repressor protein                      |
| IPI:IPI00195357.6 | RGD1564854 Uncharacterized protein                                       | IPI:IPI00231728.7      | Il1r1 Uncharacterized protein                                                     | IPI:IPI00768955.2 | LOC678772 CAS1 domain containing 1-like, partial              |
| IPI:IPI00417749.1 | Tomm22 Mitochondrial import receptor subunit TOM22 homolog               | IPI:IPI00957706.1      | Acaca Uncharacterized protein                                                     | IPI:IPI00554247.3 | Wbscr27 Uncharacterized protein                               |
| IPI:IPI00196748.3 | Cyp2c7 Cytochrome P450 2C7                                               | IPI:IPI00768597.1      | LOC687071 alanine-glyoxylate aminotransferase 2-like 1-like                       | IPI:IPI00882480.2 | Pcbp1 poly(rC) binding protein 1-like                         |
| IPI:IPI00207298.5 | Slc26a1 Sulfate anion transporter 1                                      | IPI:IPI00948802.1      | LOC100174910 Uncharacterized protein                                              | IPI:IPI00555265.1 | Nnt Uncharacterized protein                                   |
| IPI:IPI00189029.1 | Smpd1 Uncharacterized protein                                            | IPI:IPI00213231.5      | Acsl5 Long-chain-fatty-acid--CoA ligase 5                                         | IPI:IPI00326412.4 | Eno2 Gamma-enolase                                            |
| IPI:IPI00782096.2 | Xpot Uncharacterized protein                                             | IPI:IPI00363571.3      | Prodh Uncharacterized protein                                                     | IPI:IPI00202512.7 | Rpl4 60S ribosomal protein L4                                 |
| IPI:IPI00192733.4 | Eif2a Uncharacterized protein                                            | IPI:IPI00196764.1      | Cyp3a2 Cytochrome P450 3A2                                                        | IPI:IPI00327079.5 | Gstk1 Glutathione S-transferase kappa 1                       |
| IPI:IPI00769287.2 | LOC682967 rCG20581-like                                                  | IPI:IPI00203320.1      | Rasa1 Ras GTPase-activating protein 1                                             | IPI:IPI00763872.1 | Gstz1 RCG20683, isoform CRA_b                                 |
| IPI:IPI00192337.1 | Camk2a Calcium/calmodulin-dependent protein kinase type II subunit alpha | IPI:IPI00209527.3      | Mfap1a Uncharacterized protein                                                    | IPI:IPI01016529.1 | Vps29 Uncharacterized protein (Fragment)                      |
| IPI:IPI00911233.2 | Tapbp Uncharacterized protein                                            | IPI:IPI00200898.3      | Slc9a3r1 Na(+)/H(+) exchange regulatory cofactor NHE-RF1                          | IPI:IPI00362949.1 | Uqcrcf1 Cytochrome b-c1 complex subunit Rieske, mitochondrial |
| IPI:IPI00199426.8 | Abat 4-aminobutyrate aminotransferase, mitochondrial                     | IPI:IPI00365055.2      | Cstf1 Cleavage stimulation factor subunit 1                                       | IPI:IPI00781330.1 | Crk Uncharacterized protein                                   |
| IPI:IPI00231028.2 | RGD1303003 ES1 protein homolog, mitochondrial                            | IPI:IPI00366455.1      | Slc25a17 Uncharacterized protein                                                  | IPI:IPI00214269.4 | Parg Poly(ADP-ribose) glycohydrolase                          |
| IPI:IPI00231816.5 | Vsnl1 Visinin-like protein 1                                             | RRRRRIPI:IPI00202170.4 | Uncharacterized protein (Fragment)                                                | IPI:IPI00948238.1 | Tmem11 transmembrane protein 11 isoform 2                     |
| IPI:IPI00776772.1 | Uncharacterized protein                                                  | IPI:IPI00372789.3      | Tnks1bp1 Uncharacterized protein                                                  | IPI:IPI00372839.3 | Col6a2 collagen, type VI, alpha 2                             |
| IPI:IPI00231678.5 | Parp1 Poly [ADP-ribose] polymerase 1                                     | IPI:IPI00231411.7      | Atp5e ATP synthase subunit epsilon, mitochondrial                                 | IPI:IPI00230838.5 | Atp5h ATP synthase subunit d, mitochondrial                   |
| IPI:IPI00957503.1 | LOC690000 rCG53689-like                                                  | IPI:IPI00366955.4      | Als2 Alsin                                                                        | IPI:IPI00950672.1 | Aco2 Uncharacterized protein (Fragment)                       |
| IPI:IPI00211225.1 | Acadl Long-chain specific acyl-CoA dehydrogenase, mitochondrial          | IPI:IPI00188263.1      | Abhd2 Uncharacterized protein                                                     | IPI:IPI00213579.3 | Tpp2 Tripeptidyl-peptidase 2                                  |
| IPI:IPI00365035.2 | Plin2 Uncharacterized protein                                            | IPI:IPI00782737.2      | Tmub2 Uncharacterized protein (Fragment)                                          | IPI:IPI00191004.5 | Parp3 Uncharacterized protein                                 |
| IPI:IPI00210002.1 | Rbm8a RNA-binding protein 8A                                             | IPI:IPI00368202.4      | Rpp30 Uncharacterized protein                                                     | IPI:IPI00948130.1 | Stk4 Uncharacterized protein                                  |
| IPI:IPI00464947.2 | Pde12 2',5'-phosphodiesterase 12                                         | IPI:IPI00193919.5      | Suox Sulfite oxidase, mitochondrial                                               | IPI:IPI00194277.3 | Golga5 Golgin subfamily A member 5                            |
| IPI:IPI00554264.3 | Apop apolipoprotein B-100 precursor                                      | IPI:IPI00190557.2      | Phb2 Prohibitin-2                                                                 | IPI:IPI00212689.3 | Nop10 Uncharacterized protein                                 |
| IPI:IPI00199482.2 | Gstm4 Uncharacterized protein                                            | IPI:IPI00231694.7      | Xdh Xanthine dehydrogenase/ oxidase                                               | IPI:IPI00400738.1 | Galnt11 Polypeptide N-acetylgalact-                           |

---

|                   |                                                                      |                   |                                        |                   |                                                         |
|-------------------|----------------------------------------------------------------------|-------------------|----------------------------------------|-------------------|---------------------------------------------------------|
| IPI:IPI00372074.1 | Lrrc8a Leucine-rich repeat-contain -ing protein 8A                   | IPI:IPI00324172.2 | Gys2 Glycogen [starch] synthase, liver | IPI:IPI00362271.3 | osaminyltransferase 11<br>Mtmr2 Uncharacterized protein |
| IPI:IPI00921682.2 | Aldh4a1 delta-1-pyrroline-5-carboxylate dehydrogenase, mitochondrial | IPI:IPI00196226.1 | RGD1303130 Lysosomal protein NCU-G1    |                   |                                                         |

---

This table contains 231 proteins that displayed more than 1.5-fold up-regulation in NAFLD rats and 218 proteins that displayed more than 1.5-fold down-regulation in NAFLD rats. The International Protein Index (IPI) accession number, gene symbol, and name of each protein are provided here. The proteins are listed in descending order according to their fold change.



**Supporting Table S1-continued List of the down regulated proteins in rat model of nonalcoholic fatty liver disease identified by proteomics.**

| Accession No.      | Gene symbol and name                                                                       | Accession No.     | Gene symbol and name                                         | Accession No.     | Gene symbol and name                                                                             |
|--------------------|--------------------------------------------------------------------------------------------|-------------------|--------------------------------------------------------------|-------------------|--------------------------------------------------------------------------------------------------|
| IPI:IPI00332027.7  | Bhmt Betaine-homocysteine S-methyltransferase 1                                            | IPI:IPI00201325.1 | Txndc17 Uncharacterized protein                              | IPI:IPI00765236.2 | LOC684274 LOC684274 protein                                                                      |
| IPI:IPI00215358.1  | Cdh17 Cadherin-17                                                                          | IPI:IPI00480789.1 | LOC100363469 40S ribosomal protein S24                       | IPI:IPI00911188.2 | RGD1565192 hypothetical protein LOC501923                                                        |
| IPI:IPI00193769.3  | Sds Isoform 2 of L-serine dehydratase/L-threonine deaminase                                | IPI:IPI00212694.1 | Egfr Epidermal growth factor receptor                        | IPI:IPI00364813.1 | Hdac11;Hdac1 Histone deacetylase 1                                                               |
| IPI:IPI00231102.10 | Plp1 Myelin proteolipid protein                                                            | IPI:IPI00359917.1 | Thumpd1 Uncharacterized protein                              | IPI:IPI00371251.4 | Cd2bp2 Uncharacterized protein                                                                   |
| IPI:IPI00193279.1  | Oat Ornithine aminotransferase, mitochondrial                                              | IPI:IPI00949840.1 | Cth Uncharacterized protein                                  | IPI:IPI00193369.1 | Slc9a1 Sodium/hydrogen exchanger 1                                                               |
| IPI:IPI01016596.1  | Uncharacterized protein (Fragment)                                                         | IPI:IPI00951025.1 | Slc2a5 Uncharacterized protein                               | IPI:IPI00958919.1 | LOC100365121;Mut;LOC100361295 Uncharacterized protein                                            |
| IPI:IPI00213663.1  | Slc1a2 Isoform Glt1 of Excitatory amino acid transporter 2                                 | IPI:IPI00372659.3 | Dhrs11 Putative uncharacterized protein RGD1307935           | IPI:IPI00858395.1 | Aass Alpha-aminoadipic semialdehyde synthase, mitochondrial                                      |
| IPI:IPI00203165.2  | Vps28 Vacuolar protein sorting-associated protein 28 homolog                               | IPI:IPI00212014.3 | Vcp Transitional endoplasmic reticulum ATPase                | IPI:IPI00360346.3 | Cdc42bpg Uncharacterized protein                                                                 |
| IPI:IPI00208917.4  | Aldh7a1 Alpha-aminoadipic semialdehyde dehydrogenase                                       | IPI:IPI00231683.1 | Pklr Isoform L-type of Pyruvate kinase isozymes R/L          | IPI:IPI00211405.4 | Chpt1 Uncharacterized protein                                                                    |
| IPI:IPI00231451.4  | Atp1a3Sodium/potassium-transporting ATPase subunit alpha-3                                 | IPI:IPI00896149.1 | Lrch4 Lrch4 protein                                          | IPI:IPI00568124.2 | Tmlhe Isoform 1 of Trimethyllysine dioxygenase, mitochondrial                                    |
| IPI:IPI00951134.2  | Acly Uncharacterized protein                                                               | IPI:IPI00958162.1 | LOC100363143 betaine—homocysteine S-methyltransferase 1-like | IPI:IPI00781839.2 | HnrnpC Uncharacterized protein                                                                   |
| IPI:IPI00206170.6  | Syt1 Synaptotagmin-1                                                                       | IPI:IPI00208236.1 | MGC94207 UPF0598 protein C8orf82 homolog                     | IPI:IPI00829437.1 | Uncharacterized protein (Fragment)                                                               |
| IPI:IPI00230788.6  | Car3 Carbonic anhydrase 3                                                                  | IPI:IPI00203317.1 | Cyp4a2 Cytochrome P450 4A2                                   | IPI:IPI00231574.1 | Grb2 Isoform 2 of Growth factor receptor-bound protein 2                                         |
| IPI:IPI00197986.2  | Ndufv3; Ndufv3-ps1 NADH dehydrogenase [ubiquinone] flavoprotein 3, mitochondrial isoform 1 | IPI:IPI00781430.2 | Sbfl1 Uncharacterized protein                                | IPI:IPI00211864.1 | Snca Beta-synuclein                                                                              |
| IPI:IPI00480855.2  | RT1-EC2 MHC class I antigen                                                                | IPI:IPI00204133.1 | Top1 DNA topoisomerase 1                                     | IPI:IPI00365406.3 | Mtrf11 Peptide chain release factor 1-like, mitochondrial                                        |
| IPI:IPI00362160.1  | Tubb3 Tubulin beta-3 chain                                                                 | IPI:IPI00193374.1 | Slc10a1 Sodium/bile acid cotransporter                       | IPI:IPI00231949.5 | Cd14 Monocyte differentiation antigen CD14                                                       |
| IPI:IPI00231505.5  | Gnao1 Isoform Alpha-1 of Guanine nucleotide-binding protein G(o) subunit alpha             | IPI:IPI00370450.3 | Plxnb2 Uncharacterized protein                               | IPI:IPI00192696.1 | Mad111 Uncharacterized protein                                                                   |
| IPI:IPI00211127.1  | Ass1 Argininosuccinate synthase                                                            | IPI:IPI00204737.2 | Rab43 Ras-related protein Rab-43                             | IPI:IPI00364708.2 | Rab24 RAB24, member RAS oncogene family                                                          |
| IPI:IPI00208111.5  | Hsd17b2 Estradiol 17-beta-dehydrogenase 2                                                  | IPI:IPI00679256.2 | Ces1f Liver carboxylesterase 4                               | IPI:IPI00390086.4 | Atp5j2 ATP synthase, H <sup>+</sup> transporting, mitochondrial F0 complex, subunit f, isoform 2 |
| IPI:IPI00231359.3  | Acads Uncharacterized protein                                                              | IPI:IPI00193522.3 | Sec22b Vesicle-trafficking protein SEC22b                    | IPI:IPI00393599.3 | Mosc1 MOCO sulphurase C-terminal domain containing-like                                          |

|                                        |                                                                                  |                                        |                                                                                              |                                        |                                                                                                                                                |
|----------------------------------------|----------------------------------------------------------------------------------|----------------------------------------|----------------------------------------------------------------------------------------------|----------------------------------------|------------------------------------------------------------------------------------------------------------------------------------------------|
| IPI:IPI00831724.1<br>IPI:IPI00393189.2 | Cyp4v3 Cytochrome P450 4V2<br>Cyp8b1 Sterol 12-alpha hydroxylase                 | IPI:IPI00365636.3<br>IPI:IPI00199035.1 | Exd2 Uncharacterized protein<br>Pten Uncharacterized protein                                 | IPI:IPI00952462.1<br>IPI:IPI00204392.1 | Rpl14 60S ribosomal protein L14<br>St6gal1 Isoform RLA of Beta-galactoside alpha-2,6-sialyltransferase 1<br>St3gal1 Sialyltransferase ST3Gal-I |
| IPI:IPI00197770.1                      | Aldh2 Aldehyde dehydrogenase, mitochondrial                                      | IPI:IPI00559327.1                      | Ldhd Uncharacterized protein (Fragment)                                                      | IPI:IPI00454535.1                      |                                                                                                                                                |
| IPI:IPI00327781.1                      | Cyp2c11 Cytochrome P450 2C11                                                     | IPI:IPI00360386.4                      | Hnrnpul2 Uncharacterized protein                                                             | IPI:IPI00766920.3                      | Wwox WW domain-containing oxidoreductase                                                                                                       |
| IPI:IPI00231245.5                      | Hao2 Hydroxyacid oxidase 2                                                       | IPI:IPI00781382.3                      | Papss2 Uncharacterized protein                                                               | IPI:IPI00765325.2                      | Larp1 La ribonucleoprotein domain family, member 1, partial                                                                                    |
| IPI:IPI00231638.6                      | Gsta1;Gsta3;Gsta2 Glutathione S-transferase alpha-1                              | IPI:IPI00480620.1                      | Bdh1 D-beta-hydroxybutyrate dehydrogenase, mitochondrial                                     | IPI:IPI00231900.5                      | Fabp7 Fatty acid-binding protein, brain                                                                                                        |
| IPI:IPI00914173.1                      | RT1-A Rt1.aa protein                                                             | IPI:IPI00199693.3                      | Map1a Microtubule-associated protein 1A                                                      | IPI:IPI00366780.1                      | Akr1c1 Uncharacterized protein                                                                                                                 |
| IPI:IPI00650089.1                      | Gls2 Isoform 1 of Glutaminase liver isoform, mitochondrial                       | IPI:IPI00388882.3                      | Skiv2l2 Uncharacterized protein                                                              | IPI:IPI00382202.2                      | Hp Isoform 2 of Haptoglobin                                                                                                                    |
| IPI:IPI00203054.2                      | Acsf2 Acyl-CoA synthetase family member 2, mitochondrial                         | IPI:IPI00198720.1                      | Idh3a Isocitrate dehydrogenase [NAD] subunit alpha, mitochondrial                            | IPI:IPI00209421.1                      | Endog Uncharacterized protein                                                                                                                  |
| IPI:IPI00464802.1                      | Acsm5 Acyl-coenzyme A synthetase ACSM5, mitochondrial                            | IPI:IPI00208224.3                      | Stat3 Signal transducer and activator of transcription 3                                     | IPI:IPI00360317.1                      | Cd180 Uncharacterized protein                                                                                                                  |
| IPI:IPI00231637.5                      | G6pd Glucose-6-phosphate 1-dehydrogenase                                         | IPI:IPI00231662.6                      | Cyb5r3 Isoform 1 of NADH-cytochrome b5 reductase 3                                           | IPI:IPI00188858.4                      | Amacr Alpha-methylacyl-CoA racemase                                                                                                            |
| IPI:IPI00202358.2                      | Gck Isoform 2 of Glucokinase                                                     | IPI:IPI00214373.1                      | Aadat Kynurenine/alpha-aminoacidopate aminotransferase, mitochondrial                        | IPI:IPI00471540.1                      | Bhmt2 Betaine--homocysteine S-methyltransferase 2                                                                                              |
| IPI:IPI00214299.6                      | Cbs Isoform I of Cystathionine beta-synthase                                     | IPI:IPI00210389.1                      | Scfd1 Sec1 family domain-containing protein 1                                                | IPI:IPI00471759.1                      | Fam82a2 Regulator of microtubule dynamics protein 3                                                                                            |
| IPI:IPI00205372.3                      | Stxbp1 Isoform 1 of Syntaxin-binding protein 1                                   | IPI:IPI00193000.1                      | Rap2b Ras-related protein Rap-2b                                                             | IPI:IPI00211602.3                      | LOC100366273 rCG30986-like isoform 2                                                                                                           |
| IPI:IPI00870112.1                      | Dpysl2 Dihydropyrimidinase-related protein 2                                     | IPI:IPI01016475.1                      | Sel1l Uncharacterized protein                                                                | IPI:IPI00211698.1                      | Flii Uncharacterized protein                                                                                                                   |
| IPI:IPI00949736.1                      | Mbp Uncharacterized protein                                                      | IPI:IPI00358005.1                      | Chdh Uncharacterized protein                                                                 | IPI:IPI00471530.2                      | Lap3 Isoform 1 of Cytosol aminopeptidase                                                                                                       |
| IPI:IPI00470288.4<br>IPI:IPI00208280.3 | Ckb Creatine kinase B-type<br>Ptgfn Prostaglandin F2 receptor negative regulator | IPI:IPI00231200.5<br>IPI:IPI00192445.3 | Por NADPH--cytochrome P450 reductase<br>Vps24 Charged multivesicular body protein 3          | IPI:IPI00764232.2<br>IPI:IPI00196353.1 | LOC687295 Uncharacterized protein<br>Ccdc124 Uncharacterized protein                                                                           |
| IPI:IPI00194222.1                      | Cox4i1 Cytochrome c oxidase subunit 4 isoform 1, mitochondrial                   | IPI:IPI00957827.1                      | Usp24 ubiquitin specific protease 24                                                         | IPI:IPI00400734.1                      | Dpagt1 Uncharacterized protein                                                                                                                 |
| IPI:IPI00566093.4                      | Lss Lanosterol synthase                                                          | IPI:IPI00870055.2                      | Me3 NADP-dependent malic enzyme, mitochondrial                                               | IPI:IPI00373076.1                      | Atp6v1a V-type proton ATPase catalytic subunit A                                                                                               |
| IPI:IPI00231648.5<br>IPI:IPI00200661.1 | Gnmt Glycine N-methyltransferase<br>Fasn Fatty acid synthase                     | IPI:IPI00373115.2<br>IPI:IPI00957949.1 | Galk2 N-acetylgalactosamine kinase<br>LOC100362324 DEAH (Asp-Glu-Ala-His) box polypeptide 29 | IPI:IPI00211756.1<br>IPI:IPI00882405.1 | Phb Prohibitin<br>Eci1 Uncharacterized protein                                                                                                 |
| IPI:IPI00882453.1                      | Slc2a2 Solute carrier family 2, facilitated glucose transporter member 2         | IPI:IPI00211936.2                      | Ina Alpha-interneixin                                                                        | IPI:IPI00210090.3                      | Hnrnpu SP120                                                                                                                                   |
| IPI:IPI00193425.1<br>IPI:IPI00231651.6 | Bsg Isoform 2 of Basigin<br>Baspl Uncharacterized protein                        | IPI:IPI00365582.3<br>IPI:IPI00366218.3 | Cad Uncharacterized protein<br>Cct2 T-complex protein 1 subunit beta                         | IPI:IPI00562653.2<br>IPI:IPI00364061.5 | Ctsb cathepsin B preproprotein<br>Hnrnp1 heterogeneous nuclear                                                                                 |

|                   |                                                                              |                            |                                                                                          |                   |                                                                                           |
|-------------------|------------------------------------------------------------------------------|----------------------------|------------------------------------------------------------------------------------------|-------------------|-------------------------------------------------------------------------------------------|
| IPI:IPI00400736.1 | C2cd2 Uncharacterized protein                                                | IPI:IPI00324020.6          | Glul Glutamine synthetase                                                                | IPI:IPI00231081.3 | ribonucleoprotein L isoform b<br>Mapk3 Isoform 2 of Mitogen-activated<br>protein kinase 3 |
| IPI:IPI00230832.7 | Cox6c Cytochrome c oxidase subunit<br>6C-2                                   | IPI:IPI00382192.1          | Gpt2 Cc2-5                                                                               | IPI:IPI00213058.1 | RGD620382 Deoxyribonucleoside 5'-<br>monophosphate N-glycosidase                          |
| IPI:IPI00390958.3 | Cyp2c6 Cytochrome P450 2C6                                                   | IPI:IPI00565398.1          | LOC100363732;Rpl21;LOC100361811;L<br>OC100365974;LOC100362550<br>Uncharacterized protein | IPI:IPI00325260.5 | Sgta Uncharacterized protein                                                              |
| IPI:IPI00373108.2 | Ndufaf1 complex I intermediate-<br>associated protein 30, mitochon-<br>drial | IPI:IPI00231403.4          | Slc31a1 High affinity copper uptake<br>protein 1                                         | IPI:IPI00900492.1 | Rfc1 VIP-receptor-gene repressor protein                                                  |
| IPI:IPI00195357.6 | RGD1564854 Uncharacterized protein                                           | IPI:IPI00231728.7          | Hlr1 Uncharacterized protein                                                             | IPI:IPI00768955.2 | LOC678772 CAS1 domain containing 1-<br>like, partial                                      |
| IPI:IPI00417749.1 | Tomm22 Mitochondrial import receptor<br>subunit TOM22 homolog                | IPI:IPI00957706.1          | Acaca Uncharacterized protein                                                            | IPI:IPI00554247.3 | Wbscr27 Uncharacterized protein                                                           |
| IPI:IPI00196748.3 | Cyp2c7 Cytochrome P450 2C7                                                   | IPI:IPI00768597.1          | LOC687071 alanine-glyoxylate<br>aminotransferase 2-like 1-like                           | IPI:IPI00882480.2 | Pcbp1 poly(rC) binding protein 1-like                                                     |
| IPI:IPI00207298.5 | Slc26a1 Sulfate anion transporter 1                                          | IPI:IPI00948802.1          | LOC100174910 Uncharacterized protein                                                     | IPI:IPI00555265.1 | Nnt Uncharacterized protein                                                               |
| IPI:IPI00189029.1 | Smpd1 Uncharacterized protein                                                | IPI:IPI00213231.5          | Acls5 Long-chain-fatty-acid--CoA ligase<br>5                                             | IPI:IPI00326412.4 | Eno2 Gamma-enolase                                                                        |
| IPI:IPI00782096.2 | Xpot Uncharacterized protein                                                 | IPI:IPI00363571.3          | Prodh Uncharacterized protein                                                            | IPI:IPI00202512.7 | Rpl4 60S ribosomal protein L4                                                             |
| IPI:IPI00192733.4 | Eif2a Uncharacterized protein                                                | IPI:IPI00196764.1          | Cyp3a2 Cytochrome P450 3A2                                                               | IPI:IPI00327079.5 | Gstk1 Glutathione S-transferase kappa 1                                                   |
| IPI:IPI00769287.2 | LOC682967 rCG20581-like                                                      | IPI:IPI00203320.1          | Rasa1 Ras GTPase-activating protein 1                                                    | IPI:IPI00763872.1 | Gstz1 RCG20683, isoform CRA_b                                                             |
| IPI:IPI00192337.1 | Camk2a Calcium/calmodulin-dependent<br>protein kinase type II subunit alpha  | IPI:IPI00209527.3          | Mfap1a Uncharacterized protein                                                           | IPI:IPI01016529.1 | Vps29 Uncharacterized protein<br>(Fragment)                                               |
| IPI:IPI00911233.2 | Tapbp Uncharacterized protein                                                | IPI:IPI00200898.3          | Slc9a3r1 Na(+)/H(+) exchange regulatory<br>cofactor NHE-RF1                              | IPI:IPI00362949.1 | Uqcrrf1 Cytochrome b-c1 complex<br>subunit Rieske, mitochondrial                          |
| IPI:IPI00199426.8 | Abat 4-aminobutyrate aminotrans-<br>ferase, mitochondrial                    | IPI:IPI00365055.2          | Cstf1 Cleavage stimulation factor subunit<br>1                                           | IPI:IPI00781330.1 | Crk Uncharacterized protein                                                               |
| IPI:IPI00231028.2 | RGD1303003 ES1 protein homolog,<br>mitochondrial                             | IPI:IPI00366455.1          | Slc25a17 Uncharacterized protein                                                         | IPI:IPI00214269.4 | Parg Poly(ADP-ribose) glycohydrolase                                                      |
| IPI:IPI00231816.5 | Vsnl1 Visinin-like protein 1                                                 | RRRRRIPI:IPI00202170.<br>4 | Uncharacterized protein (Fragment)                                                       | IPI:IPI00948238.1 | Tmem11 transmembrane protein 11<br>isoform 2                                              |
| IPI:IPI00776772.1 | Uncharacterized protein                                                      | IPI:IPI00372789.3          | Tnks1bp1 Uncharacterized protein                                                         | IPI:IPI00372839.3 | Col6a2 collagen, type VI, alpha 2                                                         |
| IPI:IPI00231678.5 | Parp1 Poly [ADP-ribose] polymerase 1                                         | IPI:IPI00231411.7          | Atp5e ATP synthase subunit epsilon,<br>mitochondrial                                     | IPI:IPI00230838.5 | Atp5h ATP synthase subunit d,<br>mitochondrial                                            |
| IPI:IPI00957503.1 | LOC690000 rCG53689-like                                                      | IPI:IPI00366955.4          | Als2 Alsln                                                                               | IPI:IPI00950672.1 | Aco2 Uncharacterized protein (Fragment)                                                   |
| IPI:IPI00211225.1 | Acadl Long-chain specific acyl-CoA<br>dehydrogenase, mitochondrial           | IPI:IPI00188263.1          | Abhd2 Uncharacterized protein                                                            | IPI:IPI00213579.3 | Tpp2 Tripeptidyl-peptidase 2                                                              |
| IPI:IPI00365035.2 | Plin2 Uncharacterized protein                                                | IPI:IPI00782737.2          | Tmub2 Uncharacterized protein<br>(Fragment)                                              | IPI:IPI00191004.5 | Parp3 Uncharacterized protein                                                             |
| IPI:IPI00210002.1 | Rbm8a RNA-binding protein 8A                                                 | IPI:IPI00368202.4          | Rpp30 Uncharacterized protein                                                            | IPI:IPI00948130.1 | Stk4 Uncharacterized protein                                                              |
| IPI:IPI00464947.2 | Pde12 2',5'-phosphodiesterase 12                                             | IPI:IPI00193919.5          | Suox Sulfite oxidase, mitochondrial                                                      | IPI:IPI00194277.3 | Golga5 Golgin subfamily A member 5                                                        |
| IPI:IPI00554264.3 | Apob apolipoprotein B-100 precur -sor                                        | IPI:IPI00190557.2          | Phb2 Prohibitin-2                                                                        | IPI:IPI00212689.3 | Nop10 Uncharacterized protein                                                             |
| IPI:IPI00199482.2 | Gstm4 Uncharacterized protein                                                | IPI:IPI00231694.7          | Xdh Xanthine dehydrogenase/ oxidase                                                      | IPI:IPI00400738.1 | Galnt11 Polypeptide N-acetylgalact-<br>osaminyltransferase 11                             |

|                   |                                                                      |                   |                                        |                   |                               |
|-------------------|----------------------------------------------------------------------|-------------------|----------------------------------------|-------------------|-------------------------------|
| IPI:IPI00372074.1 | Lrrc8a Leucine-rich repeat-contain -ing protein 8A                   | IPI:IPI00324172.2 | Gys2 Glycogen [starch] synthase, liver | IPI:IPI00362271.3 | Mtmt2 Uncharacterized protein |
| IPI:IPI00921682.2 | Aldh4a1 delta-1-pyrroline-5-carboxylate dehydrogenase, mitochondrial | IPI:IPI00196226.1 | RGD1303130 Lysosomal protein NCU-G1    |                   |                               |

This table contains 231 proteins that displayed more than 1.5-fold up-regulation in NAFLD rats and 218 proteins that displayed more than 1.5-fold down-regulation in NAFLD rats. The International Protein Index (IPI) accession number, gene symbol, and name of each protein are provided here. The proteins are listed in descending order according to their fold change.

**Supporting Table S2** Proteins involved in the representative KEGG pathways.

| <b>Pathways</b>                | <b>Proteins</b>                                                                   |
|--------------------------------|-----------------------------------------------------------------------------------|
| Fatty acid metabolism          | Eci1; Acads; Acsl5; Adh1; Acadl; Acadvl; Eci2; Aldh7a1; Aldh2; Cyp4a2             |
| Bile secretion                 | Baat; Abcc3; Atp1a3; Slc10a1; Slc9a1; Abcb4; Ephx1; Abcb11                        |
| Primary bile acid biosynthesis | Amacr; Baat; Hsd17b4; Cyp8b1; Akr1d1                                              |
| Peroxisome                     | Baat; Amacr; Acsl5; Eci2; Gstk1; Slc25a17; Xdh; Ech1; Slc27a2; Hsd17b4; Hao2; Dao |
| PPAR signaling pathway         | Acsl5; Fabp1; Apoa1; Acadl; Slc27a2; Fabp7; Cyp8b1; Fads2; Cyp4a2                 |
| PI3K-Akt signaling pathway     | Gng10; Egfr; Gys2; Col6a2; Hsp90b1; Pten; Mapk3; Grb2; Gnb2                       |
| Oxidative phosphorylation      | Atp5e; Uqcrrf1; Cox4i1; Cox6c; Atp5h; Ndufv3; Atp6v1a; Atp5j2                     |
| MAPK signaling pathway         | Egfr; Il1r1; Rasa1; Stk4; Mapk3; Cd14; Grb2                                       |
| Glycolysis/gluconeogenesis     | Adh1; Eno2; Gck; Pklr; Aldh7a1; Aldh2; Galm                                       |
| Insulin signaling pathway      | Fasn; Gck; Pklr; Gys2; Mapk3; Grb2                                                |

**Supporting Table S3** The top functions table for direct interaction networks.

| ID | Molecules in Network                                                                                                                                                                                                                                                                                                                                                                                                                               | Score | Focus Molecules | Top Functions                                                                                   |
|----|----------------------------------------------------------------------------------------------------------------------------------------------------------------------------------------------------------------------------------------------------------------------------------------------------------------------------------------------------------------------------------------------------------------------------------------------------|-------|-----------------|-------------------------------------------------------------------------------------------------|
| 1  | 60S ribosomal subunit, ATIC, ATP5E, Atp5h, ATP5J2, ATP6V1A, CHMP3, CNN3, CRELD1, CRMP1, Cyclin D, DAO, ECH1, EEF1G, EGFR, ERBB, FABP7, GNE, H <sup>+</sup> - transpor -ting two-sector ATPase, HRSP12, JAK, MDH1, ME2, MTMR2, NADH Dehydrogenase, NDUFA8, NDUFAF1, NDUFV3, NME2, PAICS, RPL4, RPL14, RPLP2, SBF1, SH3BGRL                                                                                                                          | 51    | 29              | Nucleic Acid Metabolism, Small Molecule Biochemistry, Cellular Movement                         |
| 2  | acad, ACADL, ACADVL, BDH1 (includes EG:100037356), CYB5A, CYB5R3, CYP3A, CYP8B1, ECI1, FADS2, FLII, GCK, Glycogen synthase, GYS2, HMG CoA synthase, HMGCS1, HNF4 $\alpha$ dimer, HSD17B11, HSDL2, linoleoyl-CoA desaturase, NCOR-LXR- Oxysterol-RXR-9 cis RA, NFkB (complex), PDCD11, peptidase, PKLR, POR, PP1-C, Pp2c, SCFD1, SDS, SEC22B, SLC2A2, SLC2A5, ST3GAL1, VSNL1                                                                        | 39    | 24              | Carbohydrate Metabolism, Molecular Transport, Small Molecule Biochemistry                       |
| 3  | ACO2 (includes EG:11429), ACP2, C22orf28, CD2BP2, Cg, DECR1, FSH, FTCD, GNRH, HBB, Histone h3, Histone h4, HNRNPC, HNRNPU, Lh, LSM4 (includes EG:25804), MAD1L1, MAPK3, MAPK14, mediator, PHB2, Pka, PRMT5, RBM8A, RNA polymerase II, SELENBP1, SET, SKIV2L2, SLC27A2, snRNP, SNRPD1, Sod, TKT, USP46, WDR61                                                                                                                                       | 39    | 24              | Hematological Disease, Immunological Disease, Inflammatory Disease                              |
| 4  | ABCC3, aldehyde dehydrogenase (NAD), ALDH2, ALDH, ALDH1A1, ALDH4A1, ALDH7A1, ATP1A3, BHMT, CAR ligand-CAR-Retinoic acid-RXR $\alpha$ , Collagen Alpha1, CTH, Cyp2b13/Cyp2b9, Cyp2c6, CYP2C8, CYP2C9, Cyp2c70, Cyp2c, Cyp2c40 (includes others), CYP2D6, CYP51A1, Eotaxin, ERK1/2, Ferritin, GNMT, GST, KCND2, LGALS1, Ncoa-Nr1i2-Rxra, Ncoa-Nr1i3-Rxra, PAPSS2, PXR ligand-PXR-Retinoic acid-RXR $\alpha$ , ST6GAL1, UGT, unspecific monooxygenase | 32    | 21              | Drug Metabolism, Lipid Metabolism, Small Molecule Biochemistry                                  |
| 5  | ABCB4, ABCB11, ACACA, ACLY, AKR1C4, BAAT, CYP3A4, Cyp4a14, FASN, FTH1 (includes EG:14319), FXR ligand-FXR-Retinoic acid-RXR $\alpha$ , glucuronosyltransferase, HSD17B2, HSD17B4, HSD17B8, HSD17B, JINK1/2, Jnk, N-cor, Nr1h, Pak, PEPCK, phosphatase, PPM1F, Rxr, SULT2A1, T3-TR-RXR, thymidine kinase, UGDH, UGT1A1, UGT2A3, UGT2B17, UGT2B28, Ugt2b, VitaminD3-VDR-RXR                                                                          | 31    | 21              | Lipid Metabolism, Small Molecule Biochemistry, Endocrine System Development and Function        |
| 6  | ACADS, Akt, APOA1, APOB, CBS, COL6A2, Collagen Type VI, COX4I1, COX6C, creatine kinase, CYP2J2, cytochrome-c oxidase, FABP1, Growth hormone, HDL, HDL-cholesterol, HP, LDL-cholesterol, Mbp, NAMPT, Nos, PLIN2, PRKAA, PRODH, Rar, RBP1, RBP4, Rbp, SAA, SLC10A1, SMPD1, SNCB, SOAT2, VLDL, VLDL-cholesterol                                                                                                                                       | 30    | 20              | Lipid Metabolism, Small Molecule Biochemistry, Molecular Transport                              |
| 7  | ABAT, Alp, AMACR, AMPK, CA3, CD3, Ces, CLYBL, Collagen type I, CRK, ECI2, ESD, estrogen receptor, FAM82A2, Focal adhesion kinase, GDI1, GRB2, HEXA, HOMER3, Integrin, IRGM, MYO18A, OGN, P110, P38 MAPK, p85 (pik3r), Pdgfr, PLXNB2, PTEN, Ras homolog, RPP30, SEL1L, SLCO2A1, SRC (family), TCR                                                                                                                                                   | 29    | 20              | Lipid Metabolism, Small Molecule Biochemistry, Neurological Disease                             |
| 8  | Actin, Alpha catenin, Alpha tubulin, ANXA5, Arhgef7, atypical protein kinase C, Beta Tubulin, Cadherin, CAPG, CCT2, CDH17, CKB, Cofilin, CTNND1, DPAGT1, ENO2, Erm, F Actin, Fgf, Gm-csf, Ldh, MAP4, PI3K (complex), PI3K p85, PRDX2, PTGFRN, Rock, Rsk, SLC9A1, SLC9A3R1, STRN3, TMOD3, TPP2, TUBB3, TXNDC17                                                                                                                                      | 28    | 19              | Cancer, Infectious Disease, Cell Death and Survival                                             |
| 9  | AASS, ASGR1, BHMT, BUD31, C21orf33, C2orf47, CLEC4F, CLEC7A, CSAD, DNAJC17, ECI2, FAM21A/FAM21C, FKBP15, FRA10AC1, GABPA, GALM, HNF4A, INHBE, KIAA0196, KIAA1033, LAD1, LAP3, MAPK1, MCEE, OGFR, PPAR, SSTR4, SULT1C2, SULT2A1, SUOX, TACO1, TM4SF4, VPS29, WASH1/WASH5P, ZNF576                                                                                                                                                                   | 28    | 19              | Amino Acid Metabolism, Small Molecule Biochemistry, Lipid Metabolism                            |
| 10 | ACSL5, AGL, AKR1D1, ANXA6, BCR (complex), calpain, CD180, CPSF7, DPYSL2, Egfr dimer, EIF2A, Ephb, ERK, Fc gamma receptor, Fcer1, FYCO1, Gap, Ige, INA, JUN/JUNB/JUND, LRCH4, MAP1A, NCK, PLC gamma, Ptk, RAP2B, RASA1, RFC1, Sos, Spectrin, SPTBN2, STK4, SYK/ZAP, VAV, WWOX                                                                                                                                                                       | 25    | 18              | Cellular Function and Maintenance, Hereditary Disorder, Nervous System Development and Function |
| 11 | 2-aminoadipic acid, 20-alpha-hydroxyprogesterone, AADAT, Abca8a, ANXA3, AVPR1B, BCAS1, beta-                                                                                                                                                                                                                                                                                                                                                       | 25    | 18              | Cell Death and Survival, Cell Morphology, Developmental                                         |

|    |                                                                                                                                                                                                                                                                                                                                                                                |    |    |                                                                                                |
|----|--------------------------------------------------------------------------------------------------------------------------------------------------------------------------------------------------------------------------------------------------------------------------------------------------------------------------------------------------------------------------------|----|----|------------------------------------------------------------------------------------------------|
|    | estradiol, CA3, CCDC92, CIZ1, CYB5A, DDX54, DYNLL1, EMG1, FMO5, GLS2, HSD17B2, Kat3, kynurenine-oxoglutarate transaminase, L-glutamic acid, LEP, LRRC8A, OPLAH, PDAPI, PEMT, RAN, SFXN5, testosterone, TOMM22, TSPO, UGT8, UGT2B28, XPOT                                                                                                                                       |    |    | Disorder                                                                                       |
| 12 | ACAA1,ACAA2,ALS2,ATG14 (includes EG:100504663), CHCHD6, CLPTM1L, CNOT6, CSTF1, CSTF3, DNAJC11, ERO1LB, GALK1, GALK2, LARP1, LSS, MAN1B1, MAN2C1, MANF, MTX1, MTX2, NNT, OTUD4, PDE12, PIK3R4, RAB5B, SAMM50, TMEM173, TMLHE, TNKS1BP1, UBC, UBL4A, UQCR10, UQCRB, UQCRFS1, UVRAG                                                                                               | 24 | 17 | RNA Post-Transcriptional Modification, Carbohydrate Metabolism, Hereditary Disorder            |
| 13 | 1190003J15Rik, ALT, betaine, BHMT, CD163, Ces, Ces1d, Ces1f/Ces1l, Ces2a, Ces2a (includes others), Ces2b/Ces2c, CTBS, CYP2D6, CYP4V2, EPHX1, ESD, ethanol, FMO5, GPT2 (includes EG:108682), Gsta4, Hamp/Hamp2, HAO2, hemoglobin, HIST2H2BF, HMGB3, IL6, Keg1, Ncoa-Nr1i2-Rxra, NR1I2, Phb, PNPLA7, S-adenosylmethionine, TLR9, UOX                                             | 24 | 17 | Amino Acid Metabolism, Molecular Transport, Nucleic Acid Metabolism                            |
| 14 | ABHD2, ACSF2, ARL6IP1 (includes EG:23204), ATL3, CEBPB (includes EG:1051), CREB3, DFFB, DHRS1, DHX29, DNMT3B, DOHH, EIF5A, GALK1, GALK2, LSMD1, MDFI, MGEA5, NAA30, NAA35, NAPRT1, NOL9, PEX19, PISD, PLSCR1, PROSC, PUSL1, RNF149, RNPEP, RSPRY1, SLC25A17, SMARCA4, TBC1D17, UBC, UBE2D2, UBE2D3                                                                             | 23 | 17 | Cellular Development, Cellular Growth and Proliferation, Protein Degradation                   |
| 15 | 20s proteasome, 26s Proteasome, ADH1C, ASS1, BSG, C/ebp, caspase, CCDC92, Cyclin A, Cyclin E, Cytochrome c, ENDOG, Hsp27, Hsp70, Hsp90, Ifn gamma, Ikb, KRT18, PARG, PARP1, PARP3, PARP, PDE4DIP, PNN, Pro-inflammatory Cytokine, PSMB5, PSME1, Raf, THRAP3, Tnf, Ubiquitin, VCP, Vegf, VPS28, XDH                                                                             | 23 | 17 | Cell Morphology, Cellular Function and Maintenance, DNA Replication, Recombination, and Repair |
| 16 | ABCC4 (includes EG:10257), ACLY, Acnat1/Acnat2, ACOT2, AK1, ALKBH5, BRE, C2CD2, CCDC51, CCDC124, CD63, CYP7B1, ELOVL6, EMC3, EXD2, IAH1, MTHFD1L, MTRF1L, NHLRC3, NVL, PFKFB3, PI4K2B, PSAT1, RAB43, RGP1 (includes EG:242406), SERPINB1, SLC25A3, SLC25A10, SLC25A13, THUMPD1, TMUB2, TUFM, UBC, UQCRC2, WBSCR27                                                              | 22 | 16 | Energy Production, Lipid Metabolism, Molecular Transport                                       |
| 17 | ABCF3, ABHD16A, C6orf108, CALU, CDC42BPG, CPNE3, DDA1, DKC1, GAR1, GGA3, GGA1 (includes EG:106039), GGCX, HM13, MARC1, METTL7A, MOCS2, MOCS3, MON2, MPI, NANS, NOP10 (includes EG:36135), P4HB, PBLD, PGLS, QARS, RHOQ, RPL9, SCPEP1, STRAP, TMEM11, TMEM173, TRIP13, UBC, UNC93B1, USP42                                                                                      | 22 | 16 | Vitamin and Mineral Metabolism, Cell Morphology, Dermatological Diseases and Conditions        |
| 18 | Calcineurin protein(s), CAMK2A, CaMKII, chymotrypsin, CK1, Creb, G6PD, glutathione transferase, Gsk3, Gsta4, GSTK1, GSTM4, GSTM5, GSTT2/GSTT2B, Gstz1, HIRA, Histone H1, HNRNPL, MAP2K1/2, NFAT (complex), Nfat (family), NMDA Receptor,Pkc(s), Pkg, PLCD1, PP1 protein complex group, PP2A, PPP1R12A, Ppp2c, SLC1A2, SLC31A1, SLC4A1, SYT1 (includes EG:20979), TOP1, trypsin | 20 | 17 | Drug Metabolism, Protein Synthesis, Glutathione Depletion In Liver                             |
| 19 | ACSM5, BCL6, Bcl9-Cbp/p300-Cttnb1-Lef/Tcf, BHMT2, CBS, CENPB, CHPT1, CSNK2A1, CSRP1, EP300, G0S2, GCKR, HNF1A, HNRNPUL2, KDSR, KIF13B, KLF1, LOC687295, ME3, MYL3, NAPIL4, NFYB, SLC26A1, Slco1a4, spermine, SRF, SUMO3, TAL1, TBC1D22A, TBXAS1, TMEM184C, TMPRSS2, TNFAIP1, TRHR, USP24                                                                                       | 16 | 13 | Amino Acid Metabolism, Small Molecule Biochemistry, Cell Morphology                            |
| 20 | ALB, Ap1, BLVRB, CTSB, CYP, E2f, Fibrinogen, GDA, GOT, Hdac, HSP90B1, IFITM2, Ifn, IFN Beta, IgG, Igm, IL1, IL12 (complex), IL1R1, Immunoglobulin, Interferon alpha, LDL, Mek, MFAP1, MHC Class II (complex), NOP58, p70 S6k, PDGF BB, PLP1 (includes EG:18823), PON2, Ras, STAT3, STAT5a/b, Tgf beta, Tlr                                                                     | 14 | 12 | Neurological Disease, Cellular Development, Cellular Growth and Proliferation                  |
| 21 | C19orf12, CAD, CCND1, CDCA8, CDH13, CELF2, CEP55, CHDH, CUX1, DNAJC8, EML6, EPPK1, GALNT11, GOLGA5, GPC3, HNRPLL, IDH3A, IKBKG, IPO7, MAFF, MAML1, NOVA1, PCBP1, PRIM2, RBM8A, RPLP2, RPRD1A, SEC61A1, SENP2, SERINC3, SPG20, SUMO2, UGP2, ZBTB10, ZFP106                                                                                                                      | 11 | 10 | Post-Translational Modification, Hereditary Disorder, Neurological Disease                     |
| 22 | ADCY, CANX, CD14, Collagen type IV,Collagen(s), CTSC, DDAH1, G protein,G protein alphas, G protein beta gamma, G-protein beta, G-protein gamma, GLRX3, GNAO1, GNB2, GNG10, Gper, GRN, Laminin, Mapk, MHC Class I (complex), NADPH oxidase, Pdgf (complex), peptide-Tap1-Tap2, PLA2, PLC, Pld, Rac,                                                                             | 11 | 11 | Immunological Disease, Antigen Presentation, Protein Synthesis                                 |

---

|    |                                                                                                                                                                                                                                                                                                                                              |    |    |                                                                                               |
|----|----------------------------------------------------------------------------------------------------------------------------------------------------------------------------------------------------------------------------------------------------------------------------------------------------------------------------------------------|----|----|-----------------------------------------------------------------------------------------------|
| 23 | Rap1, Sapk, TAP1, Tap, TAPBP, Tnf receptor, TSH<br>BASP1, CA3, Calmodulin, CD4, CD8, CDH17, Ck2, CTNNB1, DOC2B, H2-Q8, IgG1, IKK (complex), IL12<br>(family), Insulin, MHC, Mhc class ii, OAT, PDAP1, PDE1C, Proinsulin, PTRF, RGN, RT1-EC2, Rt1.aa, Scf<br>Trcp beta, SERP1, SGTA, Shc, SLC6A1, STX1A, STXBP1, STXBP5, SYT2, SYTL4, Tubulin | 11 | 10 | Cellular Function and Maintenance, Molecular Transport,<br>Cellular Assembly and Organization |
|----|----------------------------------------------------------------------------------------------------------------------------------------------------------------------------------------------------------------------------------------------------------------------------------------------------------------------------------------------|----|----|-----------------------------------------------------------------------------------------------|

---



**Supporting Table S4** List of primary antibodies used in western blot assay

| Whole name of proteins                                                    | Abbreviations | Dilution ratio |
|---------------------------------------------------------------------------|---------------|----------------|
| Acyl-CoA dehydrogenase, C-2 to C-3 short chain                            | ACADS         | 1: 500         |
| Acyl-CoA synthetase long-chain family member 5                            | ACSL5         | 1: 1000        |
| Acyl-CoA dehydrogenase, very long chain                                   | ACADVL        | 1: 500         |
| Aldehyde dehydrogenase 2 family                                           | ALDH2         | 1: 200         |
| Aldehyde dehydrogenase 7 family, member A1                                | ALDH7A1       | 1: 200         |
| Bile acid CoA: amino acid N-acyltransferase(glycine N-choloyltransferase) | BAAT          | 1: 200         |
| Ubiquinol-cytochrome c reductase, Rieske iron-sulfur poly-peptide 1       | UQCRFS1       | 1: 1000        |
| Solute carrier family 27 (fatty acid transporter), member 2               | SLC27A2       | 1: 1000        |
| Mitogen activated protein kinase 3                                        | MAPK3         | 1: 1000        |
| Heat shock protein 90, beta, member 1                                     | HSP90B1       | 1: 500         |
| Serine/threonine kinase 4                                                 | STK4          | 1: 1000        |
| Alpha-methylacyl-CoA racemase                                             | AMACR         | 1: 500         |
| Growth factor receptor bound protein 2                                    | GRB2          | 1: 500         |
| Cytochrome P450, family 4, subfamily a, polypeptide 2                     | CYP4A2        | 1: 500         |
| Alcohol dehydrogenase 1                                                   | ADH1          | 1: 500         |
| Glyceraldehyde-3-phosphate dehydrogenase                                  | GAPDH         | 1:2000         |

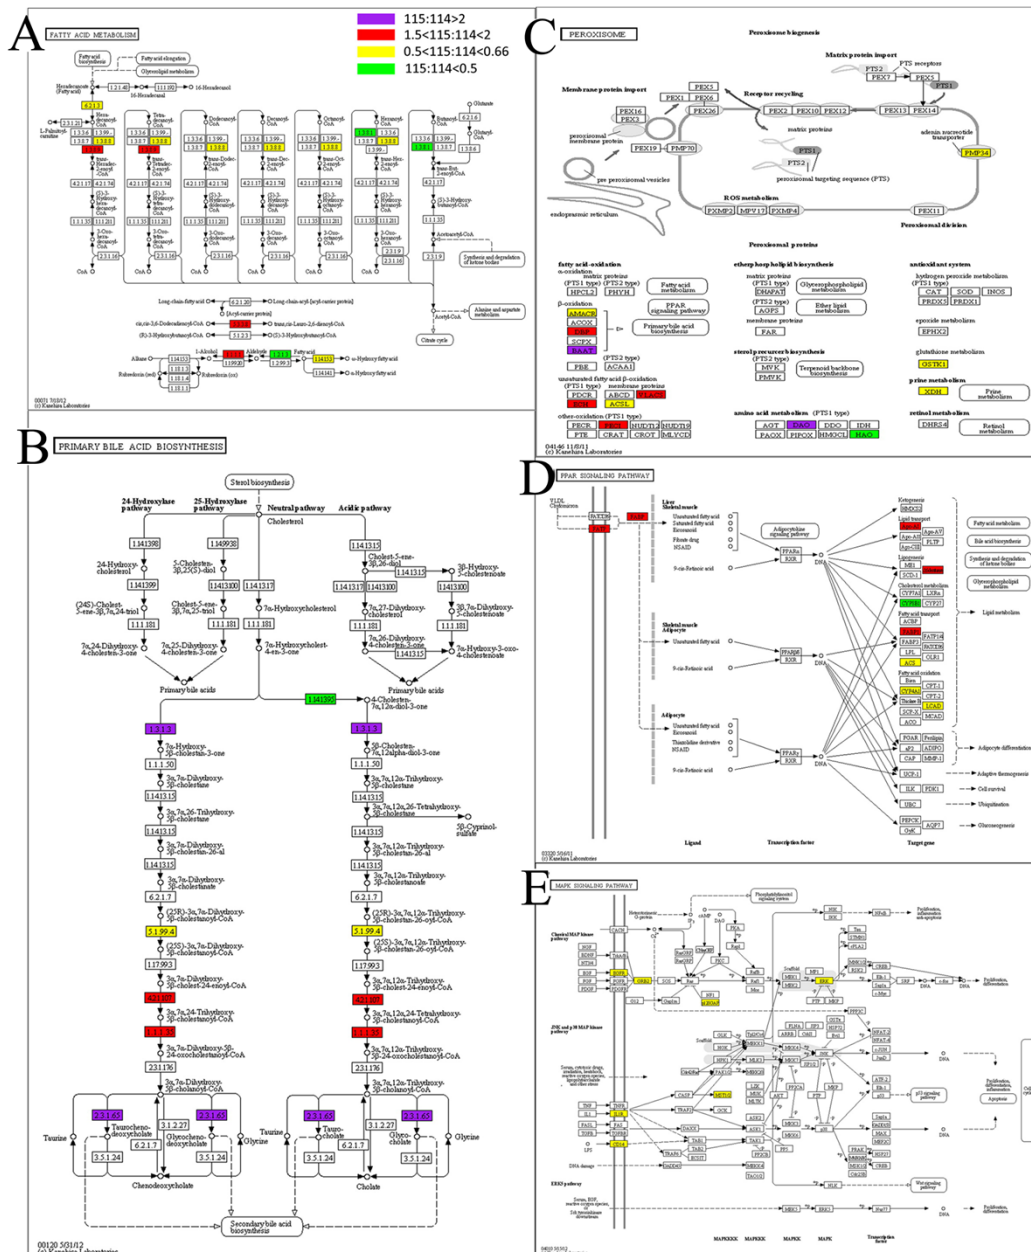

**Supporting Figure S1** Representative KEGG pathway analysis of the differentially expressed proteins. (A) Fatty acid metabolism: EC:6.2.1.3, Acsl5; EC:1.3.8.1: Acads; EC:1.3.8. 9: Acadvl; EC:1.3.8.8: Acadl; EC:1.1.1.1: Adhl; EC:1.2.1.3: Aldh2 and Aldh7a1; EC:1.14.15.3: Cyp4a2; EC:5.3.3.8: Eci1 and Eci2. (B) Primary bile acid biosynthesis: EC:1.14.13.95: Cyp8b1; EC:1.3.1.3: Akr1d1; EC:5.1.99.4: Amacr; EC:4.2.1.107 and EC:1.1.1.35: Hsd17b4; EC:2.3.1.65: Baat. (C) Peroxisome. (D) PPAR signaling pathway. (E) MAPK signaling pathway.

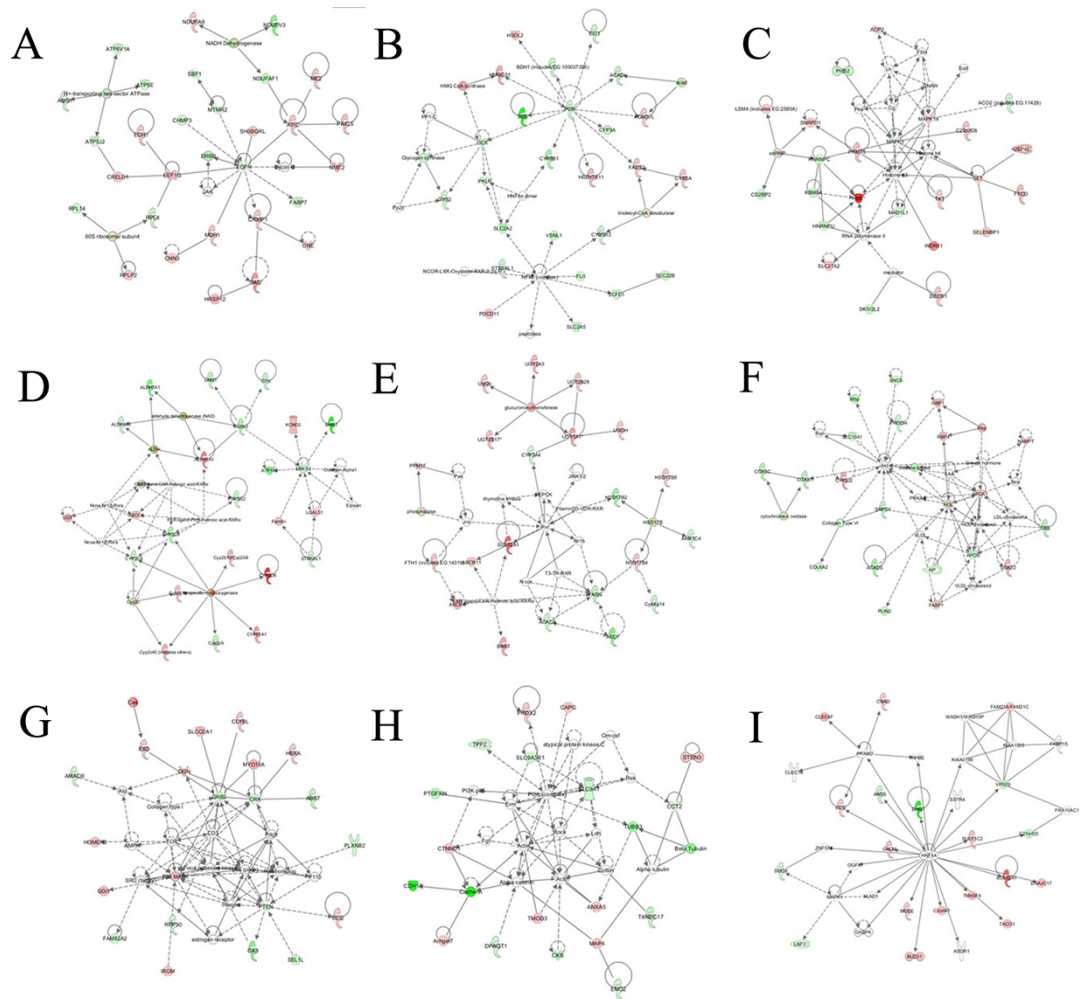

**Supporting Figure S2** The direct interaction functional networks map of differentially expressed proteins in the database. The direct interaction network scores were 29 (**A**, network 1), 24 (**B**, network 2), 24 (**C**, network 3), 21 (**D**, network 4), 21 (**E**, network 5), 20 (**F**, network 6), 20 (**G**, network 7), 19 (**H**, network 8) and 19 (**I**, network 9), respectively. For the functional analysis of networks, see Supporting Table S3.

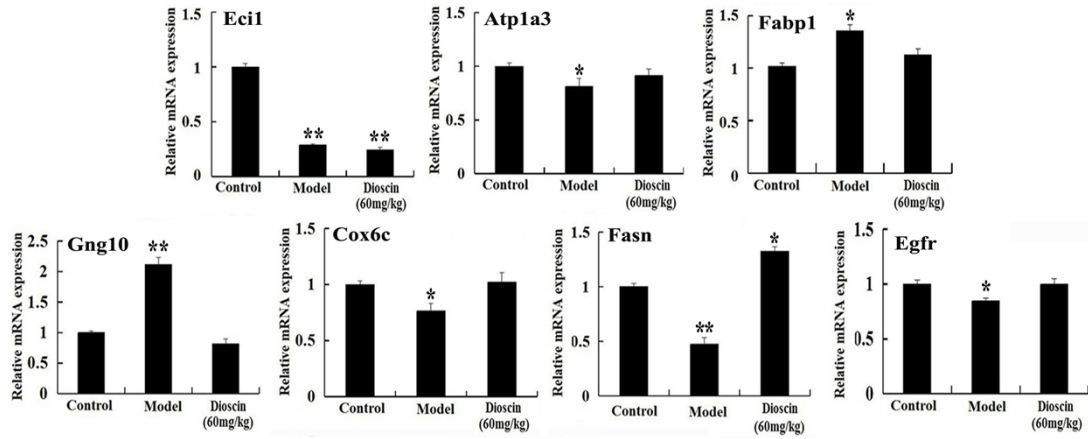

Supporting **Figure S3**. Effects of dioscin on the gene expressions of *Eci1*, *Atp1a3*, *Fabp1*, *Gng10*, *Cox6c*, *Fasn* and *Egfr* in liver tissues of rats in control, model and dioscin (60 mg/kg) groups by quantitative real-time PCR assays. Values are expressed as mean  $\pm$  SD in each group. \*  $p < 0.05$  and \*\*  $p < 0.01$  compared with control group.

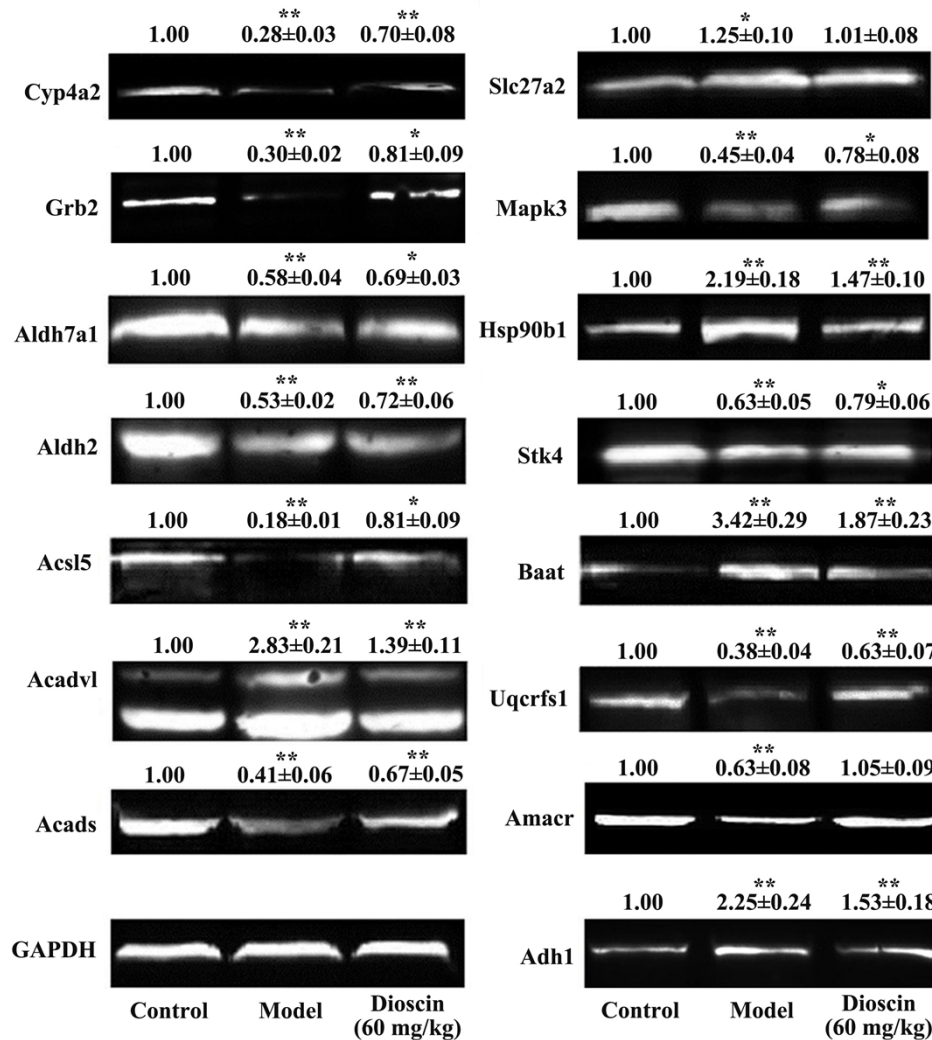

Supporting **Figure S4**. Effects of dioscin on the protein expressions of ACLS5, ACADS, ACADVL, ALDH2, ALDH7A1, BAAT, UQCRFS1, MAPK3, SLC27A2, HSP90B1, AMACR, GRB2, CYP4A2, ADH1 and STK4 in liver tissues of rats in control, model and dioscin (60 mg/kg) groups by western blot analysis. Values are expressed as mean  $\pm$  SD in each group. \*  $p < 0.05$  and \*\*  $p < 0.01$  compared with control group.
